# Supplementary material for: Detection of anabolic steroids via cyclodextrin-promoted fluorescence modulation
Source: RSC Adv. 2020 Jul 1;10(42):25108–15. doi: 10.1039/d0ra03485a (PMC9055181; doi:10.1039/d0ra03485a)
Supplement: RA-010-D0RA03485A-s001 [file RA-010-D0RA03485A-s001.pdf]

*Electronic Supporting Information for*  
**Detection of Anabolic Steroids via Cyclodextrin-Promoted Fluorescence  
Modulation**

Anna Z. Haynes and Mindy Levine

## Table of Contents

|                                                                                                     |     |
|-----------------------------------------------------------------------------------------------------|-----|
| MATERIALS AND METHODS .....                                                                         | S3  |
| DETAILS OF ANALYTES AND FLUOROPHORES .....                                                          | S3  |
| EXPERIMENTAL PROCEDURES.....                                                                        | S4  |
| Experimental Procedure for Fluorescence Modulation Experiments .....                                | S4  |
| Experimental Procedure for Limit of Detection Experiments .....                                     | S5  |
| Experimental Procedure for Array Generation Experiments.....                                        | S6  |
| Experimental Procedure for Computational Experiments .....                                          | S7  |
| SUMMARY TABLES .....                                                                                | S8  |
| Summary Tables for Fluorescence Modulation Experiments .....                                        | S8  |
| Summary Tables for Limit of Detection Experiments .....                                             | S9  |
| Summary Tables for Array Generation Experiments .....                                               | S10 |
| SUMMARY FIGURES .....                                                                               | S15 |
| Summary Figures for Individual Fluorescence Modulation Experiments Using Fluorophore <b>6</b> ..... | S15 |
| Summary Figures for Combined Fluorescence Modulation Experiments using Fluorophore <b>6</b> .....   | S35 |
| Summary Figures for Limit of Detection (LOD) Experiments .....                                      | S37 |
| Summary Figures for Array Generation Experiments.....                                               | S42 |
| Summary Figures for Computational Experiments .....                                                 | S47 |
| REFERENCES .....                                                                                    | S51 |

## MATERIALS AND METHODS

The anabolic steroid analytes, chemicals required to make buffer solutions, fluorophore Rhodamine 6G, and solvent tetrahydrofuran were obtained from Sigma-Aldrich Chemical company and the cyclodextrins were obtained from Tokyo Chemical Industry (TCI). All chemicals were used as received without further purification. All fluorescence measurements were performed using a Shimadzu RF 6000 spectrophotometer. The excitation and emission slit widths were set to 3.0 nm. All fluorescence spectra were integrated vs. wavenumber on the X-axis using OriginPro 2019 Version 9.60. All arrays were generated using SYSTAT Version 13.1.

### DETAILS OF ANALYTES AND FLUOROPHORES

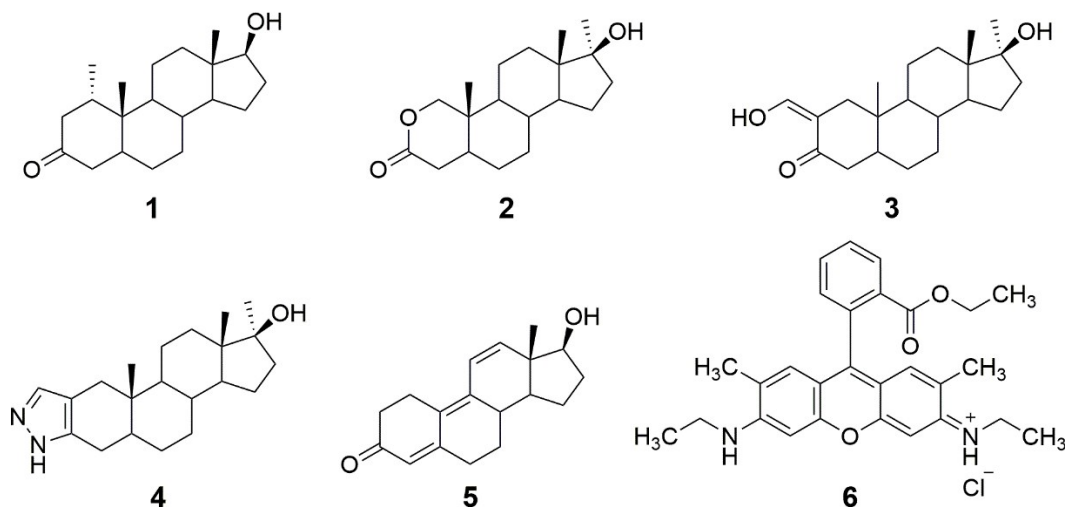

**Figure S1:** Structure of anabolic analytes (compound **1**: Mesterolone; compound **2**: Oxandrolone; compound **3**: Oxymetholone; compound **4**: Stanozolol; compound **5**: Trenbolone) and fluorophore Rhodamine 6G (compound **6**)

All analyte samples were prepared at a concentration of 1.0 mg/mL in THF. The fluorophore solution was prepared at a concentration of 0.1 mg/mL in THF. An 0.1 M citrate buffer was prepared by combining 2.409 grams of sodium citrate and 0.347 grams of citric acid in a 1.0 L volumetric flask and diluting to the mark with distilled water. The pH of the buffer was measured at 6.1, and remained consistent throughout the experimental procedures. Cyclodextrin solutions were prepared at a concentration of 10 mmol in the citrate buffer. The final concentrations of the analytes and fluorophore are shown in Table S1, below:

**Table S1:** Concentration of analytes and fluorophore in solution prior to dilution via sample preparation

| Compound Number | Final Concentration (mM) |
|-----------------|--------------------------|
| <b>1</b>        | 3.28                     |
| <b>2</b>        | 3.26                     |
| <b>3</b>        | 3.01                     |
| <b>4</b>        | 3.04                     |
| <b>5</b>        | 3.62                     |
| <b>6</b>        | 2.09                     |

## EXPERIMENTAL PROCEDURES

### Experimental Procedure for Fluorescence Modulation Experiments

Fluorescence modulation experiments were done with 5  $\mu\text{L}$ , 10  $\mu\text{L}$ , and 20  $\mu\text{L}$  sequential additions of analyte.

The fluorescence modulation values for each analyte-cyclodextrin combination were determined according to the following procedure:

1. 100  $\mu\text{L}$  of fluorophore **6** solution (0.1 mg/mL) in THF was measured into six 15 mL glass vials (vial 1 for THF, vial 2 for analyte 1, vial 3 for analyte 2, etc.). 2.00 mL of a 10 mM cyclodextrin in citrate buffer and 0.40 mL 0.1 M citrate buffer were added to each (citrate buffer was at pH 6.1). The vials were capped and left to stabilize for 48 hours in a dark drawer.
2. After the 48 hours, the contents of one vial and 5.0  $\mu\text{L}$  of analyte were added to the cuvette and stirred thoroughly to ensure homogeneity. The solution was excited at 490 nm and recorded from 500-800 nm. Four repeat measurements were taken. This step was repeated for each analyte and an additional time, adding 5.0  $\mu\text{L}$  of THF instead of an analyte solution to use as a control.
3. Step 1 and 2 were repeated for each analyte-cyclodextrin combination (18 trials in total). In all cases, the solution was excited at the same wavelength (490 nm) and the emission spectra from 500 to 800 nm was recorded four times.
4. To conduct an experiment with no cyclodextrin present, step 1 was repeated but citrate buffer solution was substituted in place of the cyclodextrin solution. The final contents of the vials were then 100  $\mu\text{L}$  of fluorophore **6** solution and 2.4 mL of 0.1 M citrate buffer.
5. After 48 hours, step 2 was repeated using this set of solutions containing no cyclodextrin for each analyte. The solutions were excited at the same wavelength (490 nm) and the emission spectra from 500 to 800 nm was recorded four times.
6. Emission spectra were integrated versus wavenumber on the X-axis using OriginPro software and fluorescence modulation ratios were determined according to Equation 1, below:

$$\text{Fluorophore Modulation Ratios} = Fl_{\text{analyte}} / Fl_{\text{blank}} \quad (\text{Eq. S1})$$

where  $Fl_{\text{analyte}}$  represents the integrated fluorescence emission of the fluorophore in the presence of the analyte and  $Fl_{\text{blank}}$  represents the integrated fluorescence emission of the fluorophore in the absence of the analyte.

7. These ratios were recorded.

Step 2 and 5 were repeated with sequential additions for total addition amounts of 10  $\mu\text{L}$  and 20  $\mu\text{L}$  of analyte. The final concentrations of the analytes and the fluorophore in solution using each of the three addition protocols are summarized in Table S2, below:

**Table S2:** Final concentrations ( $\mu\text{M}$ ) of analytes and fluorophore in fluorescence modulation trials

| Compound | 5 $\mu\text{L}$ | 10 $\mu\text{L}$ | 20 $\mu\text{L}$ |
|----------|-----------------|------------------|------------------|
| <b>1</b> | 6.419           | 12.81            | 25.53            |
| <b>2</b> | 6.419           | 12.81            | 25.53            |
| <b>3</b> | 5.890           | 11.76            | 23.42            |
| <b>4</b> | 5.949           | 11.88            | 23.67            |
| <b>5</b> | 7.226           | 14.42            | 28.73            |
| <b>6</b> | 8.334           | 8.317            | 8.284            |

## Experimental Procedure for Limit of Detection Experiments

The limit of detection (LOD), defined as the lowest concentration of the analyte that can be detected, was obtained using the calibration curve method, following procedures reported by Loock et. al.<sup>1</sup> The limit of quantification (LOQ) is the lowest concentration of analyte that can be reliably and accurately quantified. The limit of detection and quantification experiments were conducted following literature-reported procedures.<sup>1,2</sup>

LOD experiments were done with sequential 5  $\mu$ L additions of analyte, according to the procedures listed below:

1. 100  $\mu$ L of fluorophore **6** solution (0.1 mg/mL) in THF was measured into a 15 mL glass vial. 2.00 mL of a 10 mM cyclodextrin in citrate buffer and 0.40 mL 0.1 M citrate buffer were added (citrate buffer was at pH 6). The vial was capped and left to stabilize for 48 hours.
2. The solution was transferred to a quartz cuvette and then excited at 490 nm and the fluorescence emission spectra was recorded from 500 to 800 nm. Each fluorescence measurement was repeated six times
3. 5.0  $\mu$ L of the analyte solution in THF was added to the cuvette and stirred thoroughly to ensure homogeneity. The solution was excited at the same wavelength (490 nm) and the emission was measured between 500 nm and 800 nm. Six repeat measurements were taken.
4. Step 2 was repeated four times for total addition volumes of 10  $\mu$ L, 15  $\mu$ L, 20  $\mu$ L, and 25  $\mu$ L of the analyte solution. In all cases, the solution was excited at the same wavelength (490 nm) and the emission spectra from 500 to 800 nm was recorded six times.
5. Emission spectra were integrated versus wavenumber on the X-axis using OriginPro software, and were used to generate calibration curves with analyte concentration on the X-axis and integrated fluorescence emission on the Y-axis. The curve was fitted with a linear trendline and the equation of the line was determined.
6. The measurements from Step 1, the emission spectra of the combination of the Rhodamine solution and  $\beta$ -cyclodextrin solution with no addition of analyte, are referred to as the blank in the following calculations.
7. The limit of the blank ( $LOD_{blank}$ ) is defined according to the following equation:

$$LOD_{blank} = m_{blank} - 3(SD_{blank}) \quad (\text{Eq. S2})$$

where  $m_{blank}$  is the mean of the blank integrations and  $SD_{blank}$  is the standard deviation of those measurements.

8. The  $LOD_{blank}$  was then entered into the equation determined in Step 4 as the y-value. The corresponding x-value was calculated. This value is the LOD of the analyte in  $\mu$ M in the system.
9. The LOQ ( $LOQ_{blank}$ ) was calculated in a similar manner to the LOD. The limit of quantification of the blank is defined according to the following equation:

$$LOQ_{blank} = m_{blank} - 10(SD_{blank}). \quad (\text{Eq. S3})$$

This value is then entered as the y-value from step 4 and the corresponding x-value was calculated. This is the value of the LOQ of the analyte for the system in  $\mu$ M.

All steps were repeated for each analyte-cyclodextrin combination (5 analytes x 3 cyclodextrin solutions = 15 trials).

The summary tables of these results for each analyte-cyclodextrin combination are shown in Tables S4-S6 (*vide infra*).

### **Experimental Procedure for Array Generation Experiments**

Linear discriminant analysis was performed using SYSTAT 13 statistical computing software with the following software settings<sup>3</sup>:

- (a) Linear Discriminant Analysis
- (b) Grouping Variable: Analytes
- (c) Predictors: Cyclodextrin hosts
- (d) Long-Range Statistics: Mahal.

These experiments were then repeated using only two predictors (i.e. cyclodextrins) instead of all three, and the results of array-based analysis for each pair of predictors is reported herein as well.

### **Experimental Procedure for Computational Experiments**

Spartan software version '18 was used to calculate the equilibrium molecular conformations of each analyte in their ground states in the gas phase using a semi-empirical PM3 model for each analyte. This allowed an electrostatic potential map surface to be overlaid over the molecules, using the mesh overlay function.

## SUMMARY TABLES

### Summary Tables for Fluorescence Modulation Experiments

**Table S3.** Fluorescence modulation results obtained for analytes **1-5** with various cyclodextrins in the presence of fluorophore **6**<sup>a</sup>

| Addition amount | Analyte  | $\beta$ -Cyclodextrin ( $\beta$ -CD) | Methyl- $\beta$ -Cyclodextrin (Me- $\beta$ -CD) | 2-Hydroxypropyl- $\beta$ -Cyclodextrin (2-HPCD) | No Cyclodextrin (CD) |
|-----------------|----------|--------------------------------------|-------------------------------------------------|-------------------------------------------------|----------------------|
| 5 $\mu$ L       | <b>1</b> | $0.958 \pm 0.001$                    | $0.956 \pm 0.000$                               | $0.905 \pm 0.000$                               | $1.001 \pm 0.001$    |
|                 | <b>2</b> | $0.997 \pm 0.001$                    | $0.971 \pm 0.000$                               | $0.957 \pm 0.000$                               | $0.973 \pm 0.001$    |
|                 | <b>3</b> | $1.004 \pm 0.001$                    | $0.956 \pm 0.000$                               | $0.966 \pm 0.000$                               | $1.006 \pm 0.001$    |
|                 | <b>4</b> | $0.989 \pm 0.003$                    | $0.998 \pm 0.001$                               | $0.906 \pm 0.000$                               | $0.979 \pm 0.001$    |
|                 | <b>5</b> | $0.997 \pm 0.001$                    | $0.978 \pm 0.001$                               | $0.999 \pm 0.001$                               | $1.047 \pm 0.001$    |
| 10 $\mu$ L      | <b>1</b> | $0.950 \pm 0.000$                    | $0.938 \pm 0.000$                               | $0.900 \pm 0.000$                               | $1.004 \pm 0.001$    |
|                 | <b>2</b> | $0.990 \pm 0.001$                    | $0.967 \pm 0.000$                               | $0.953 \pm 0.000$                               | $0.990 \pm 0.000$    |
|                 | <b>3</b> | $0.988 \pm 0.001$                    | $0.955 \pm 0.000$                               | $0.962 \pm 0.000$                               | $1.009 \pm 0.001$    |
|                 | <b>4</b> | $0.985 \pm 0.002$                    | $0.995 \pm 0.000$                               | $0.901 \pm 0.000$                               | $0.969 \pm 0.002$    |
|                 | <b>5</b> | $0.992 \pm 0.001$                    | $0.975 \pm 0.001$                               | $0.992 \pm 0.000$                               | $1.040 \pm 0.000$    |
| 20 $\mu$ L      | <b>1</b> | $0.948 \pm 0.001$                    | $0.932 \pm 0.000$                               | $0.892 \pm 0.000$                               | $0.994 \pm 0.001$    |
|                 | <b>2</b> | $0.974 \pm 0.001$                    | $0.966 \pm 0.001$                               | $0.947 \pm 0.000$                               | $0.987 \pm 0.000$    |
|                 | <b>3</b> | $0.978 \pm 0.001$                    | $0.954 \pm 0.000$                               | $0.955 \pm 0.000$                               | $1.004 \pm 0.003$    |
|                 | <b>4</b> | $0.975 \pm 0.000$                    | $0.986 \pm 0.001$                               | $0.952 \pm 0.000$                               | $0.972 \pm 0.001$    |
|                 | <b>5</b> | $0.975 \pm 0.001$                    | $0.969 \pm 0.001$                               | $0.988 \pm 0.001$                               | $1.036 \pm 0.001$    |

<sup>a</sup> All values were calculated using Equation S1, and results reported represent an average of at least four trials.

## Summary Tables for Limit of Detection Experiments

**Table S4.** Summary table for limits of detection experiments with  $\beta$ -CD<sup>a,b</sup>

| Analyte  | LOD ( $\mu$ M) | LOQ ( $\mu$ M) | Equation                         | R <sup>2</sup> |
|----------|----------------|----------------|----------------------------------|----------------|
| <b>1</b> | 17.03          | 46.58          | $y = -1292.6693x + 2133565.2492$ | 0.8369         |
| <b>2</b> | 11.39          | 35.32          | $y = -2079.0320x + 2229038.8629$ | 0.9589         |
| <b>3</b> | 8.914          | 21.42          | $y = -2559.6708x + 2233461.8386$ | 0.9308         |
| <b>4</b> | 7.665          | 30.49          | $y = -2237.8468x + 2220576.1935$ | 0.9776         |
| <b>5</b> | 6.108          | 24.35          | $y = -2308.8616x + 2241047.0782$ | 0.9498         |

<sup>a</sup> All LOD values were calculated using Equation S2.

<sup>a</sup> All LOQ values were calculated using Equation S3.

**Table S5.** Summary table for limits of detection experiments with Me- $\beta$ -CD<sup>a,b</sup>

| Analyte  | LOD ( $\mu$ M) | LOQ ( $\mu$ M) | Equation                           | R <sup>2</sup> |
|----------|----------------|----------------|------------------------------------|----------------|
| <b>1</b> | 5.300          | 11.72          | $y = -27374.1167x + 31229827.0035$ | 0.8451         |
| <b>2</b> | 3.886          | 18.34          | $y = -11127.1906x + 31855034.7259$ | 0.9193         |
| <b>3</b> | 0.148          | 4.102          | $y = -9482.3445x + 31383949.2786$  | 0.8929         |
| <b>4</b> | 5.981          | 18.21          | $y = -16056.2718x + 32744010.5956$ | 0.9379         |
| <b>5</b> | 0.049          | 4.586          | $y = -21626.3876x + 32220132.7800$ | 0.9755         |

<sup>a</sup> All LOD values were calculated using Equation S2.

<sup>a</sup> All LOQ values were calculated using Equation S3.

**Table S6.** Summary table for limits of detection experiments with 2-HPCD<sup>a,b</sup>

| Analyte  | LOD ( $\mu$ M) | LOQ ( $\mu$ M) | Equation                           | R <sup>2</sup> |
|----------|----------------|----------------|------------------------------------|----------------|
| <b>1</b> | 2.335          | 7.129          | $y = -18245.1311x + 26534054.7777$ | 0.9956         |
| <b>2</b> | 3.352          | 14.66          | $y = -12790.4792x + 28037979.4349$ | 0.9657         |
| <b>3</b> | 1.886          | 8.361          | $y = -21071.8113x + 28366093.4431$ | 0.9945         |
| <b>4</b> | 0.775          | 3.371          | $y = -10283.4719x + 26474157.9172$ | 0.8972         |
| <b>5</b> | 3.587          | 11.53          | $y = -11788.1436x + 29202530.0773$ | 0.9438         |

<sup>a</sup> All LOD values were calculated using Equation S2.

<sup>a</sup> All LOQ values were calculated using Equation S3.

## Summary Tables for Array Generation Experiments

With 5  $\mu$ L analyte additions

**Table S7.** Linear discriminant analysis results with  $\beta$ -CD, Me- $\beta$ -CD, and 2-HPCD as predictors

### Jackknifed Classification Matrix

|       | 1 | 2 | 3 | 4 | 5 | THF | %correct |
|-------|---|---|---|---|---|-----|----------|
| 1     | 4 | 0 | 0 | 0 | 0 | 0   | 100      |
| 2     | 0 | 4 | 0 | 0 | 0 | 0   | 100      |
| 3     | 0 | 0 | 4 | 0 | 0 | 0   | 100      |
| 4     | 0 | 0 | 0 | 4 | 0 | 0   | 100      |
| 5     | 0 | 0 | 0 | 0 | 4 | 0   | 100      |
| THF   | 0 | 0 | 0 | 0 | 0 | 4   | 100      |
| Total | 4 | 4 | 4 | 4 | 4 | 4   | 100      |

### Cumulative Proportion of Total Dispersion

|       |       |       |
|-------|-------|-------|
| 0.601 | 0.990 | 1.000 |
|-------|-------|-------|

**Table S8.** Linear discriminant analysis results using  $\beta$ -CD and Me- $\beta$ -CD as predictors

### Jackknifed Classification Matrix

|       | 1 | 2 | 3 | 4 | 5 | THF | %correct |
|-------|---|---|---|---|---|-----|----------|
| 1     | 4 | 0 | 0 | 0 | 0 | 0   | 100      |
| 2     | 0 | 4 | 0 | 0 | 0 | 0   | 100      |
| 3     | 0 | 0 | 4 | 0 | 0 | 0   | 100      |
| 4     | 0 | 0 | 0 | 4 | 0 | 0   | 100      |
| 5     | 0 | 0 | 0 | 0 | 4 | 0   | 100      |
| THF   | 0 | 0 | 0 | 0 | 0 | 4   | 100      |
| Total | 4 | 4 | 4 | 4 | 4 | 4   | 100      |

### Cumulative Proportion of Total Dispersion

|       |       |
|-------|-------|
| 0.951 | 1.000 |
|-------|-------|

**Table S9.** Linear discriminant analysis results using  $\beta$ -CD and 2-HPCD as predictors

### Jackknifed Classification Matrix

|       | 1 | 2 | 3 | 4 | 5 | THF | %correct |
|-------|---|---|---|---|---|-----|----------|
| 1     | 4 | 0 | 0 | 0 | 0 | 0   | 100      |
| 2     | 0 | 4 | 0 | 0 | 0 | 0   | 100      |
| 3     | 0 | 0 | 4 | 0 | 0 | 0   | 100      |
| 4     | 0 | 0 | 0 | 4 | 0 | 0   | 100      |
| 5     | 0 | 0 | 0 | 0 | 4 | 0   | 100      |
| THF   | 0 | 0 | 0 | 0 | 1 | 3   | 75       |
| Total | 4 | 4 | 4 | 4 | 5 | 3   | 96       |

### Cumulative Proportion of Total Dispersion

|       |       |
|-------|-------|
| 0.973 | 1.000 |
|-------|-------|

**Table S10.** Linear discriminant analysis results using Me- $\beta$ -CD and 2-HPCD as predictors

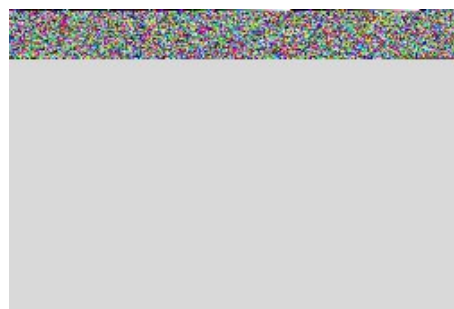

Cumulative Proportion of Total Dispersion

|       |       |
|-------|-------|
| 0.711 | 1.000 |
|-------|-------|

With 10  $\mu$ L analyte additions

**Table S11.** Linear discriminant analysis results with  $\beta$ -CD, Me- $\beta$ -CD, and 2-HPCD as predictors

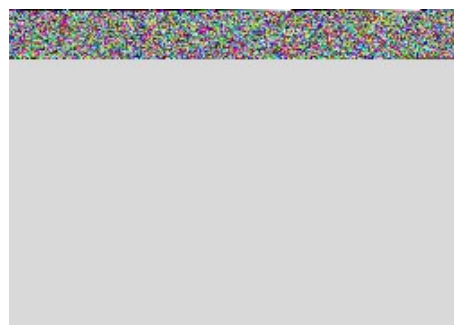

Cumulative Proportion of Total Dispersion

|       |       |       |
|-------|-------|-------|
| 0.888 | 0.999 | 1.000 |
|-------|-------|-------|

**Table S12.** Linear discriminant analysis results using  $\beta$ -CD and Me- $\beta$ -CD as predictors

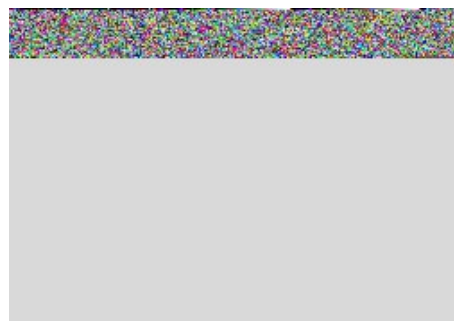

Cumulative Proportion of Total Dispersion

|       |       |
|-------|-------|
| 0.981 | 1.000 |
|-------|-------|

**Table S13.** Linear discriminant analysis results using  $\beta$ -CD and 2-HPCD as predictors

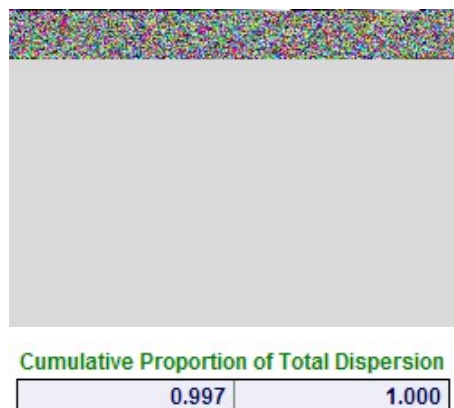

**Table S14.** Linear discriminant analysis results using Me- $\beta$ -CD and 2-HPCD as predictors

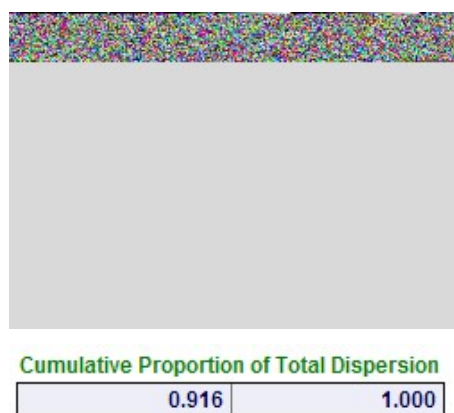

With 20  $\mu$ L analyte additions

**Table S15.** Linear discriminant analysis results using  $\beta$ -CD, Me- $\beta$ -CD, and 2-HPCD as predictors

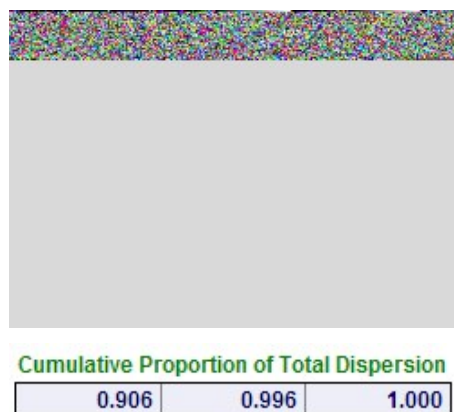

**Table S16.** Linear discriminant analysis results using  $\beta$ -CD and Me- $\beta$ -CD as predictors

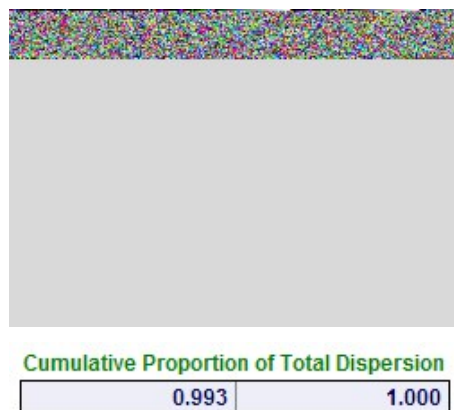

**Table S17.** Linear discriminant analysis results using  $\beta$ -CD and 2-HPCD as predictors

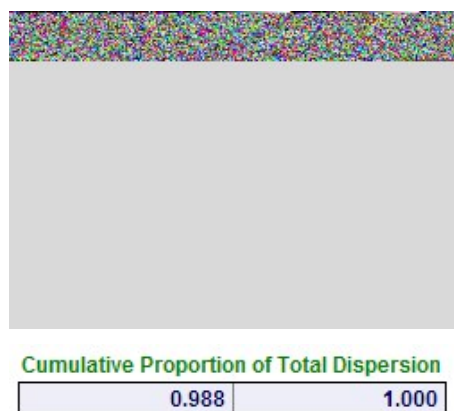

**Table S18.** Linear discriminant analysis results using Me- $\beta$ -CD and 2-HPCD as predictors

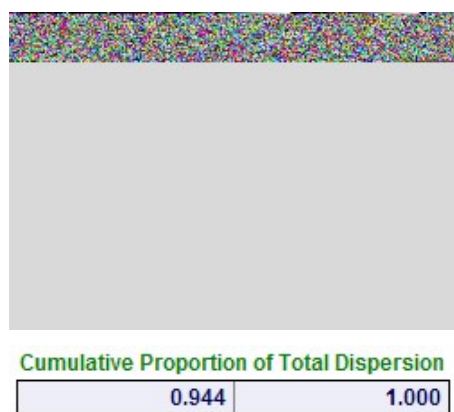

## All Additions with THF

**Table S19.** Linear discriminant analysis results with  $\beta$ -CD, Me- $\beta$ -CD, and 2-HPCD as predictors

### Jackknifed Classification Matrix

|            | 10uL - 1 | 10uL - 2 | 10uL - 3 | 10uL - 4 | 10uL - 5 | 10uL - THF | 20uL - 1 | 20uL - 2 | 20uL - 3 | 20uL - 4 | 20uL - 5 | 20uL - THF | 5uL - 1 | 5uL - 2 | 5uL - 3 | 5uL - 4 | 5uL - 5 | 5uL - THF | %correct |
|------------|----------|----------|----------|----------|----------|------------|----------|----------|----------|----------|----------|------------|---------|---------|---------|---------|---------|-----------|----------|
| 10uL - 1   | 4        | 0        | 0        | 0        | 0        | 0          | 0        | 0        | 0        | 0        | 0        | 0          | 0       | 0       | 0       | 0       | 0       | 0         | 100      |
| 10uL - 2   | 0        | 4        | 0        | 0        | 0        | 0          | 0        | 0        | 0        | 0        | 0        | 0          | 0       | 0       | 0       | 0       | 0       | 0         | 100      |
| 10uL - 3   | 0        | 0        | 4        | 0        | 0        | 0          | 0        | 0        | 0        | 0        | 0        | 0          | 0       | 0       | 0       | 0       | 0       | 0         | 100      |
| 10uL - 4   | 0        | 0        | 0        | 4        | 0        | 0          | 0        | 0        | 0        | 0        | 0        | 0          | 0       | 0       | 0       | 0       | 0       | 0         | 100      |
| 10uL - 5   | 0        | 0        | 0        | 0        | 4        | 0          | 0        | 0        | 0        | 0        | 0        | 0          | 0       | 0       | 0       | 0       | 0       | 0         | 100      |
| 10uL - THF | 0        | 0        | 0        | 0        | 0        | 0          | 0        | 0        | 0        | 0        | 0        | 4          | 0       | 0       | 0       | 0       | 0       | 0         | 0        |
| 20uL - 1   | 0        | 0        | 0        | 0        | 0        | 0          | 4        | 0        | 0        | 0        | 0        | 0          | 0       | 0       | 0       | 0       | 0       | 0         | 100      |
| 20uL - 2   | 0        | 0        | 0        | 0        | 0        | 0          | 0        | 4        | 0        | 0        | 0        | 0          | 0       | 0       | 0       | 0       | 0       | 0         | 100      |
| 20uL - 3   | 0        | 0        | 0        | 0        | 0        | 0          | 0        | 0        | 4        | 0        | 0        | 0          | 0       | 0       | 0       | 0       | 0       | 0         | 100      |
| 20uL - 4   | 0        | 0        | 0        | 0        | 0        | 0          | 0        | 0        | 0        | 4        | 0        | 0          | 0       | 0       | 0       | 0       | 0       | 0         | 100      |
| 20uL - 5   | 0        | 0        | 0        | 0        | 0        | 0          | 0        | 0        | 0        | 0        | 4        | 0          | 0       | 0       | 0       | 0       | 0       | 0         | 100      |
| 20uL - THF | 0        | 0        | 0        | 0        | 0        | 4          | 0        | 0        | 0        | 0        | 0        | 0          | 0       | 0       | 0       | 0       | 0       | 0         | 0        |
| 5uL - 1    | 0        | 0        | 0        | 0        | 0        | 0          | 0        | 0        | 0        | 0        | 0        | 0          | 4       | 0       | 0       | 0       | 0       | 0         | 100      |
| 5uL - 2    | 0        | 0        | 0        | 0        | 0        | 0          | 0        | 0        | 0        | 0        | 0        | 0          | 0       | 4       | 0       | 0       | 0       | 0         | 100      |
| 5uL - 3    | 0        | 0        | 0        | 0        | 0        | 0          | 0        | 0        | 0        | 0        | 0        | 0          | 0       | 0       | 4       | 0       | 0       | 0         | 100      |
| 5uL - 4    | 0        | 0        | 0        | 0        | 0        | 0          | 0        | 0        | 0        | 0        | 0        | 0          | 0       | 0       | 0       | 4       | 0       | 0         | 100      |
| 5uL - 5    | 0        | 0        | 0        | 0        | 0        | 0          | 0        | 0        | 0        | 0        | 0        | 0          | 0       | 0       | 0       | 0       | 4       | 0         | 100      |
| 5uL - THF  | 0        | 0        | 0        | 0        | 0        | 4          | 0        | 0        | 0        | 0        | 0        | 0          | 0       | 0       | 0       | 0       | 0       | 0         | 0        |
| Total      | 4        | 4        | 4        | 4        | 4        | 8          | 4        | 4        | 4        | 4        | 4        | 4          | 4       | 4       | 4       | 4       | 4       | 0         | 83       |

### Cumulative Proportion of Total Dispersion

|       |       |       |
|-------|-------|-------|
| 0.787 | 0.992 | 1.000 |
|-------|-------|-------|

## All Additions excluding THF

**Table S20.** Linear discriminant analysis results with  $\beta$ -CD, Me- $\beta$ -CD, and 2-HPCD as predictors

### Jackknifed Classification Matrix

|          | 10uL - 1 | 10uL - 2 | 10uL - 3 | 10uL - 4 | 10uL - 5 | 20uL - 1 | 20uL - 2 | 20uL - 3 | 20uL - 4 | 20uL - 5 | 5uL - 1 | 5uL - 2 | 5uL - 3 | 5uL - 4 | 5uL - 5 | %correct |
|----------|----------|----------|----------|----------|----------|----------|----------|----------|----------|----------|---------|---------|---------|---------|---------|----------|
| 10uL - 1 | 4        | 0        | 0        | 0        | 0        | 0        | 0        | 0        | 0        | 0        | 0       | 0       | 0       | 0       | 0       | 100      |
| 10uL - 2 | 0        | 4        | 0        | 0        | 0        | 0        | 0        | 0        | 0        | 0        | 0       | 0       | 0       | 0       | 0       | 100      |
| 10uL - 3 | 0        | 0        | 4        | 0        | 0        | 0        | 0        | 0        | 0        | 0        | 0       | 0       | 0       | 0       | 0       | 100      |
| 10uL - 4 | 0        | 0        | 0        | 4        | 0        | 0        | 0        | 0        | 0        | 0        | 0       | 0       | 0       | 0       | 0       | 100      |
| 10uL - 5 | 0        | 0        | 0        | 0        | 4        | 0        | 0        | 0        | 0        | 0        | 0       | 0       | 0       | 0       | 0       | 100      |
| 20uL - 1 | 0        | 0        | 0        | 0        | 0        | 4        | 0        | 0        | 0        | 0        | 0       | 0       | 0       | 0       | 0       | 100      |
| 20uL - 2 | 0        | 0        | 0        | 0        | 0        | 0        | 4        | 0        | 0        | 0        | 0       | 0       | 0       | 0       | 0       | 100      |
| 20uL - 3 | 0        | 0        | 0        | 0        | 0        | 0        | 0        | 4        | 0        | 0        | 0       | 0       | 0       | 0       | 0       | 100      |
| 20uL - 4 | 0        | 0        | 0        | 0        | 0        | 0        | 0        | 0        | 4        | 0        | 0       | 0       | 0       | 0       | 0       | 100      |
| 20uL - 5 | 0        | 0        | 0        | 0        | 0        | 0        | 0        | 0        | 0        | 4        | 0       | 0       | 0       | 0       | 0       | 100      |
| 5uL - 1  | 0        | 0        | 0        | 0        | 0        | 0        | 0        | 0        | 0        | 0        | 4       | 0       | 0       | 0       | 0       | 100      |
| 5uL - 2  | 0        | 0        | 0        | 0        | 0        | 0        | 0        | 0        | 0        | 0        | 0       | 4       | 0       | 0       | 0       | 100      |
| 5uL - 3  | 0        | 0        | 0        | 0        | 0        | 0        | 0        | 0        | 0        | 0        | 0       | 0       | 4       | 0       | 0       | 100      |
| 5uL - 4  | 0        | 0        | 0        | 0        | 0        | 0        | 0        | 0        | 0        | 0        | 0       | 0       | 0       | 4       | 0       | 100      |
| 5uL - 5  | 0        | 0        | 0        | 0        | 0        | 0        | 0        | 0        | 0        | 0        | 0       | 0       | 0       | 0       | 4       | 100      |
| Total    | 4        | 4        | 4        | 4        | 4        | 4        | 4        | 4        | 4        | 4        | 4       | 4       | 4       | 4       | 4       | 100      |

### Cumulative Proportion of Total Dispersion

|       |       |       |
|-------|-------|-------|
| 0.827 | 0.993 | 1.000 |
|-------|-------|-------|

## SUMMARY FIGURES

### Summary Figures for Individual Fluorescence Modulation Experiments Using Fluorophore 6

With 5  $\mu\text{L}$  analyte addition

$\beta$ -CD

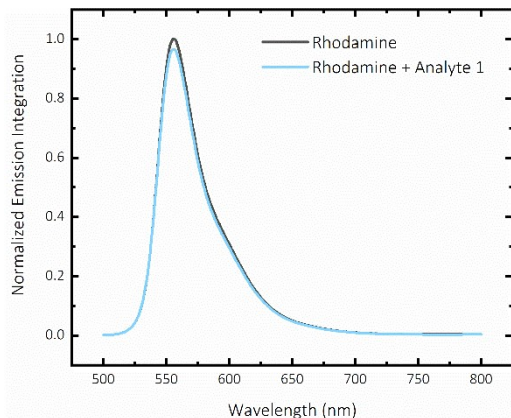

**Figure S2.** Fluorescence modulation of analyte 1 in the presence of  $\beta$ -CD

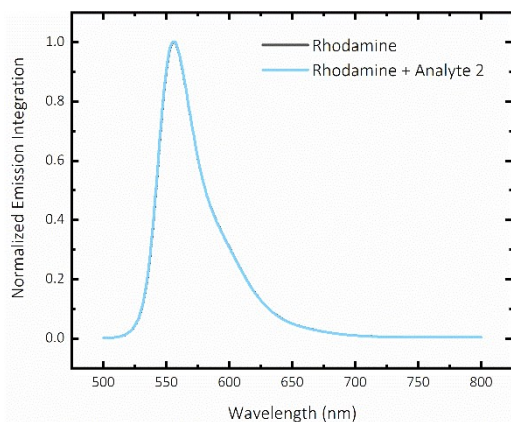

**Figure S3.** Fluorescence modulation of analyte 2 in the presence of  $\beta$ -CD

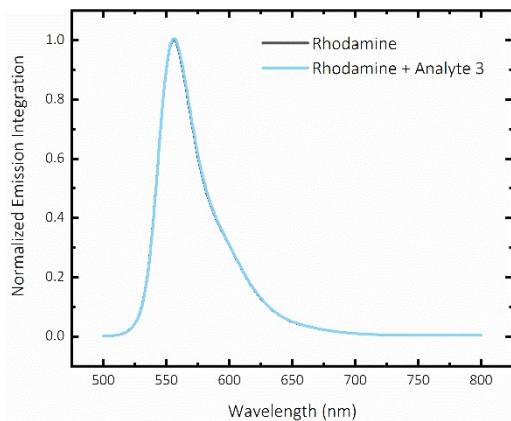

**Figure S4.** Fluorescence modulation of analyte 3 in the presence of  $\beta$ -CD

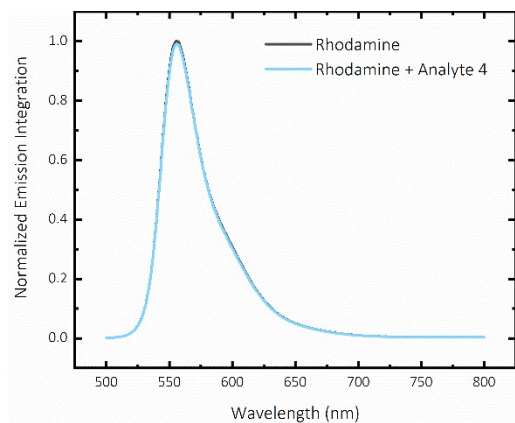

**Figure S5.** Fluorescence modulation of analyte **4** in the presence of  $\beta$ -CD

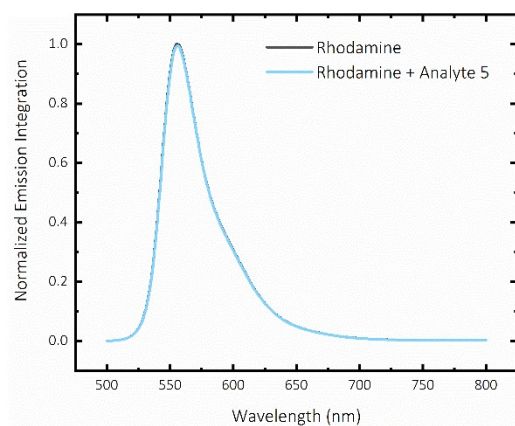

**Figure S6.** Fluorescence modulation of analyte **5** in the presence of  $\beta$ -CD

Me- $\beta$ -CD

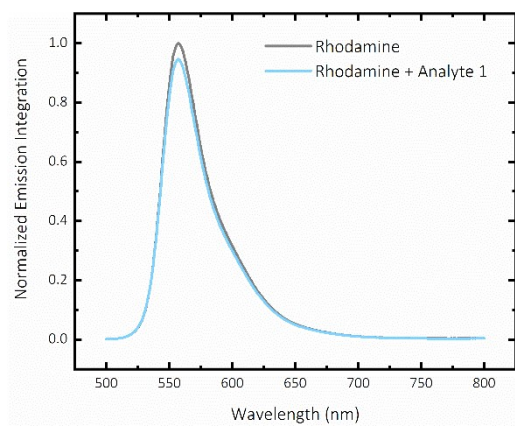

**Figure S7.** Fluorescence modulation of analyte **1** in the presence of Me- $\beta$ -CD

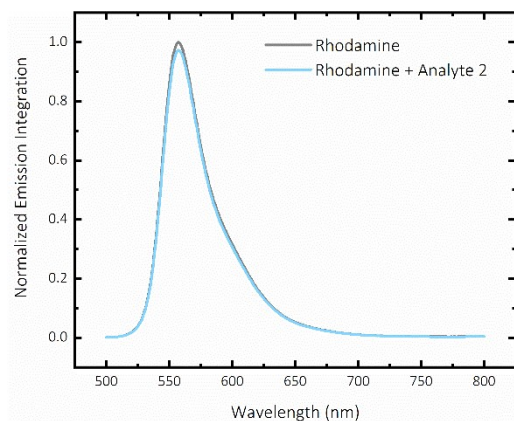

**Figure S8.** Fluorescence modulation of analyte **2** in the presence of Me- $\beta$ -CD

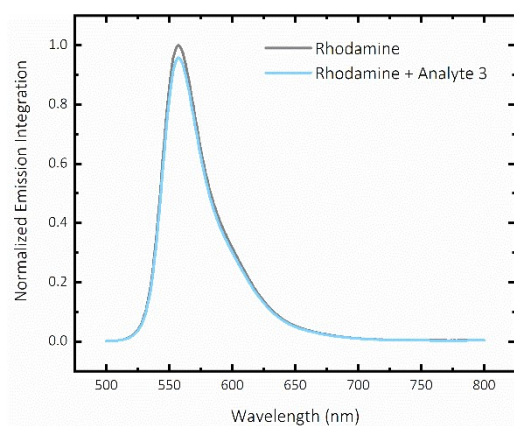

**Figure S9.** Fluorescence modulation of analyte **3** in the presence of Me- $\beta$ -CD

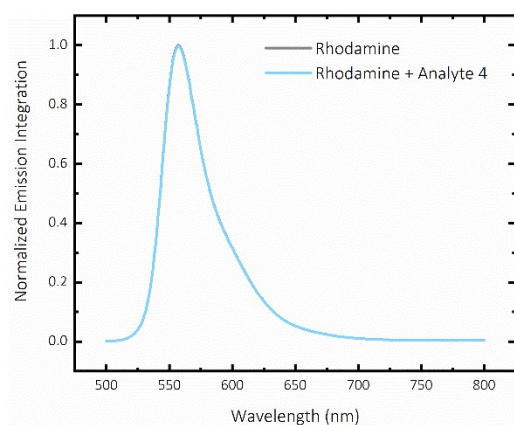

**Figure S10.** Fluorescence modulation of analyte **4** in the presence of Me- $\beta$ -CD

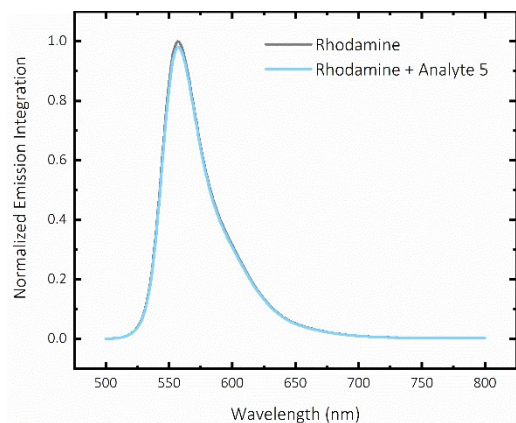

**Figure S11.** Fluorescence modulation of analyte **5** in the presence of Me- $\beta$ -CD  
2-HPCD

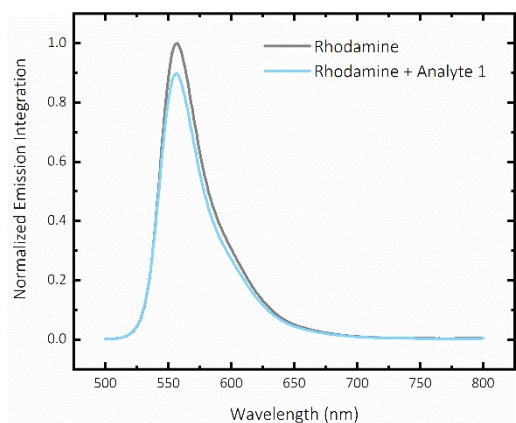

**Figure S12.** Fluorescence modulation of analyte **1** in the presence of 2-HPCD

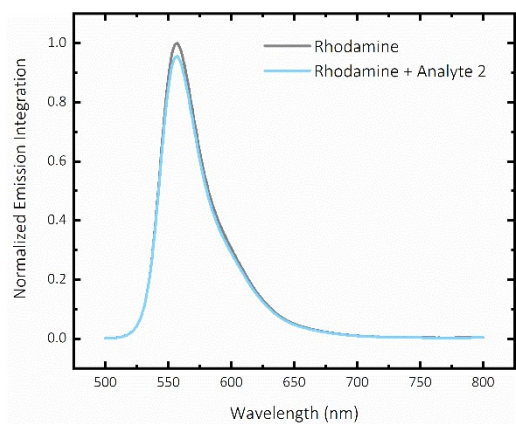

**Figure S13.** Fluorescence modulation of analyte **2** in the presence of 2-HPCD

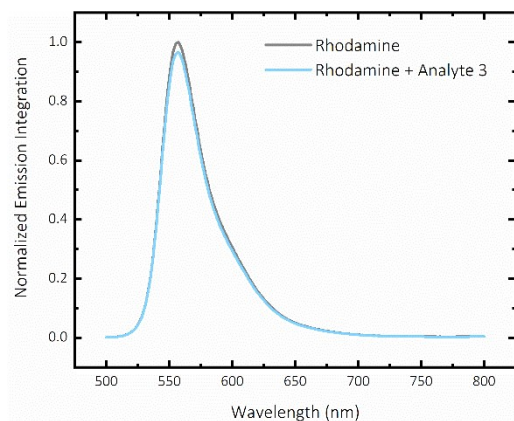

**Figure S14.** Fluorescence modulation of analyte **3** in the presence of 2-HPCD

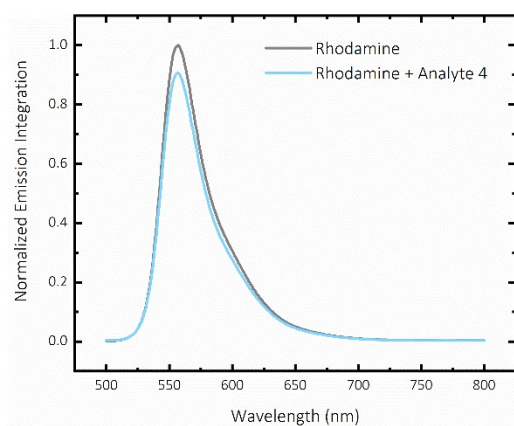

**Figure S15.** Fluorescence modulation of analyte **4** in the presence of 2-HPCD

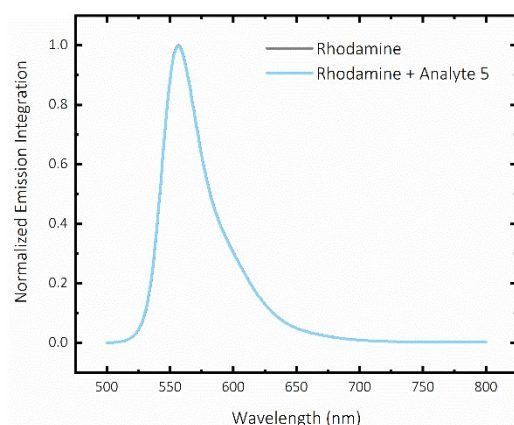

**Figure S16.** Fluorescence modulation of analyte **5** in the presence of 2-HPCD

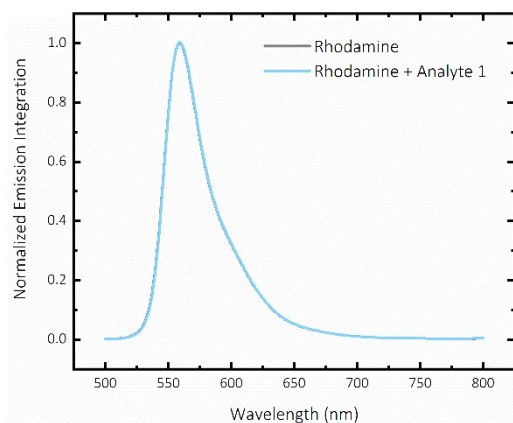

**Figure S17.** Fluorescence modulation of analyte **1** in the presence of no CD

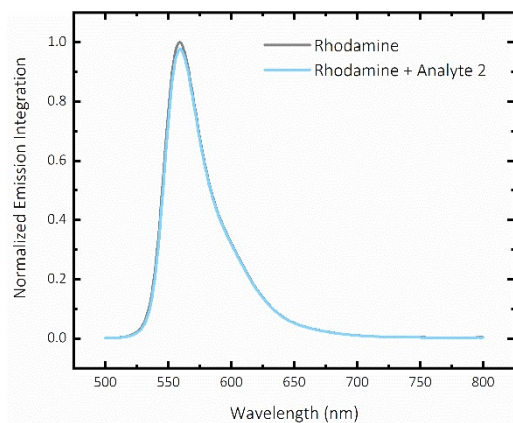

**Figure S18.** Fluorescence modulation of analyte **2** in the presence of no CD

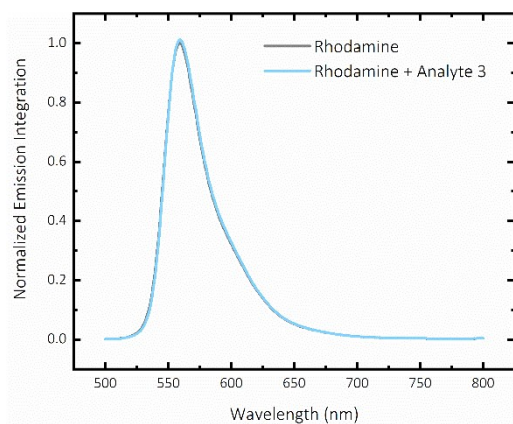

**Figure S19.** Fluorescence modulation of analyte **3** in the presence of no CD

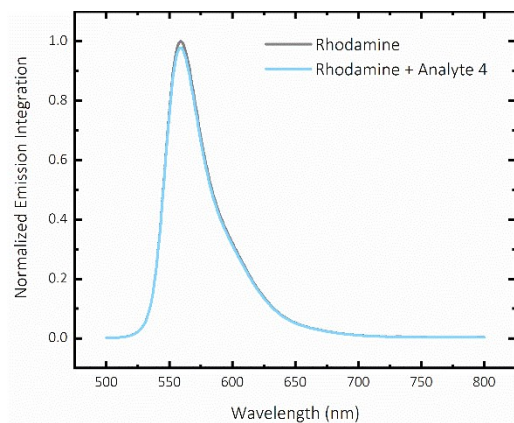

**Figure S20.** Fluorescence modulation of analyte **4** in the presence of no CD

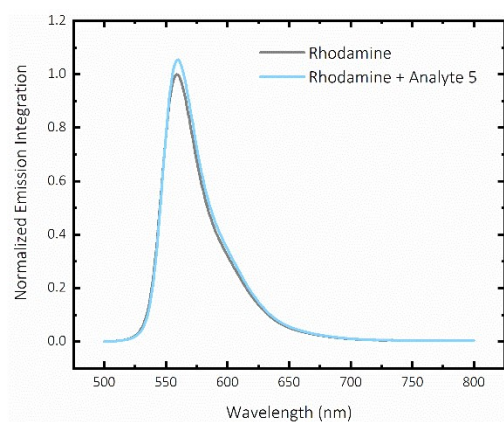

**Figure S21.** Fluorescence modulation of analyte **5** in the presence of no CD  
With 10  $\mu\text{L}$  analyte addition

$\beta$ -CD

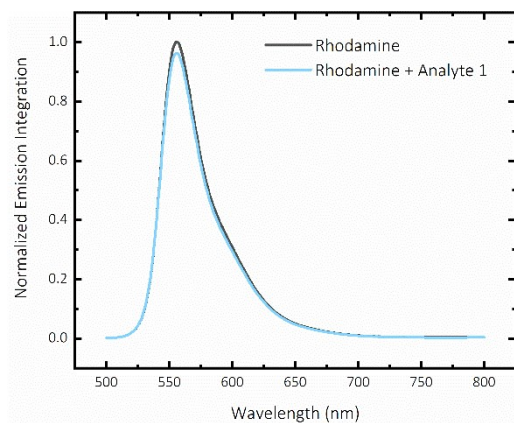

**Figure S22.** Fluorescence modulation of analyte **1** in the presence of  $\beta$ -CD

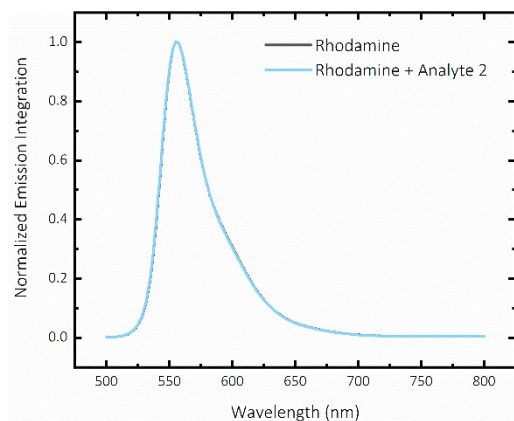

**Figure S23.** Fluorescence modulation of analyte **2** in the presence of  $\beta$ -CD

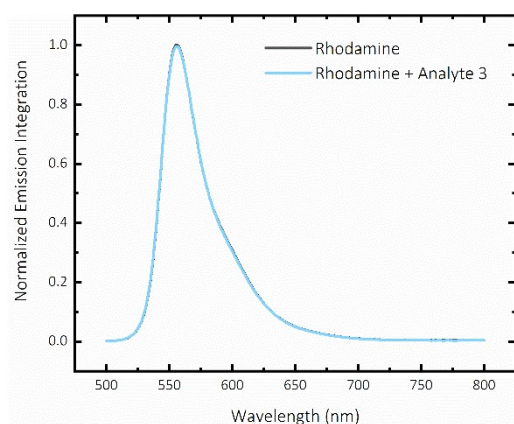

**Figure S24.** Fluorescence modulation of analyte **3** in the presence of  $\beta$ -CD

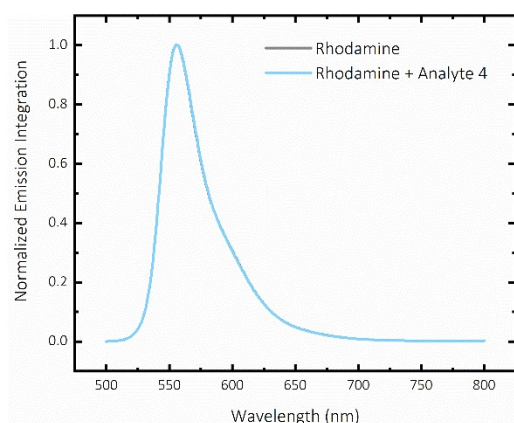

**Figure S25.** Fluorescence modulation of analyte **4** in the presence of  $\beta$ -CD

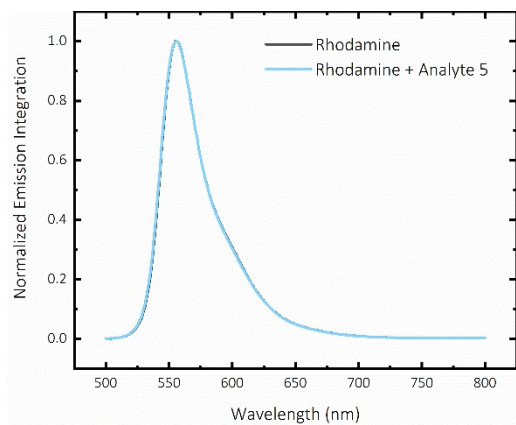

**Figure S26.** Fluorescence modulation of analyte **5** in the presence of  $\beta$ -CD

Me- $\beta$ -CD

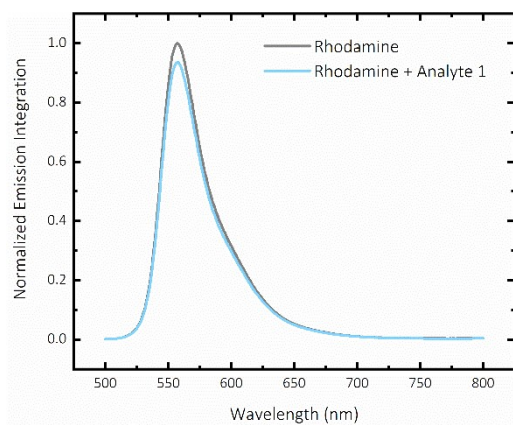

**Figure S27.** Fluorescence modulation of analyte **1** in the presence of Me- $\beta$ -CD

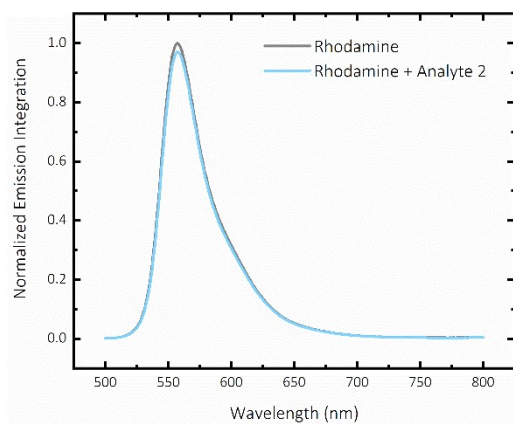

**Figure S28.** Fluorescence modulation of analyte **2** in the presence of Me- $\beta$ -CD

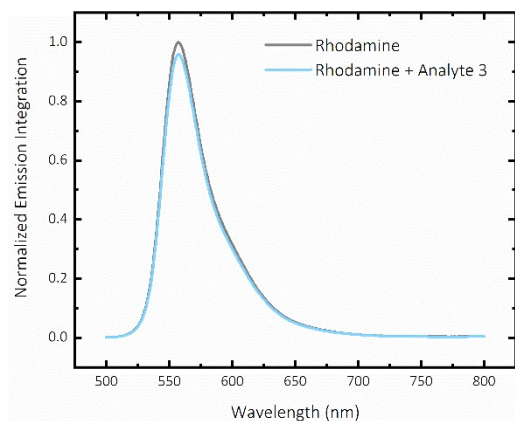

**Figure S29.** Fluorescence modulation of analyte **3** in the presence of Me-β-CD

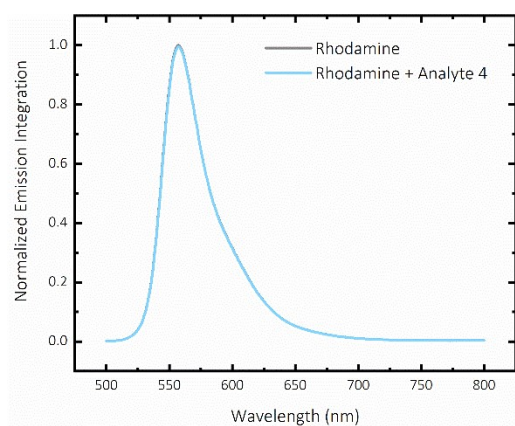

**Figure S30.** Fluorescence modulation of analyte **4** in the presence of Me-β-CD

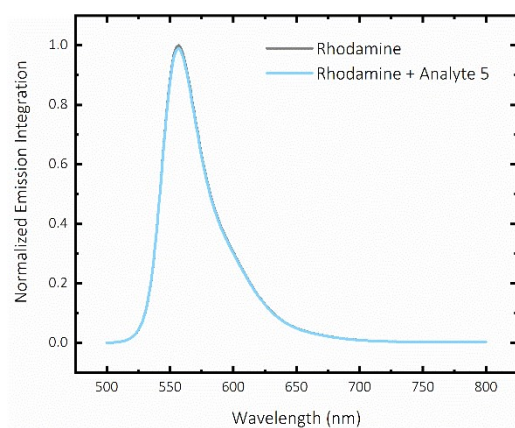

**Figure S31.** Fluorescence modulation of analyte **5** in the presence of Me-β-CD

## 2-HPCD

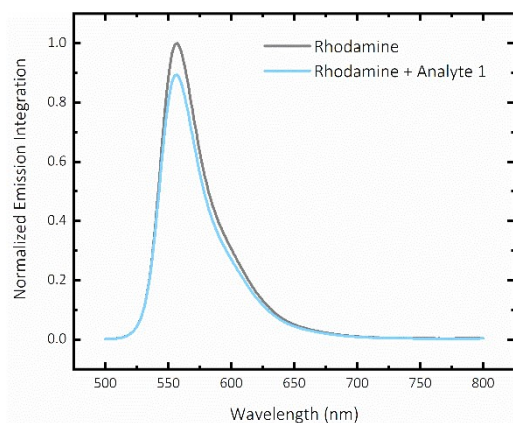

**Figure S32.** Fluorescence modulation of analyte **1** in the presence of 2-HPCD

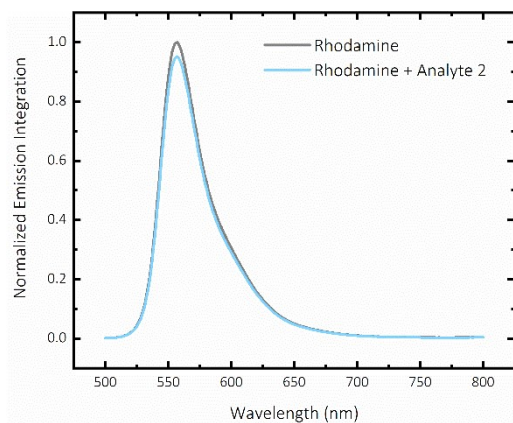

**Figure S33.** Fluorescence modulation of analyte **2** in the presence of 2-HPCD

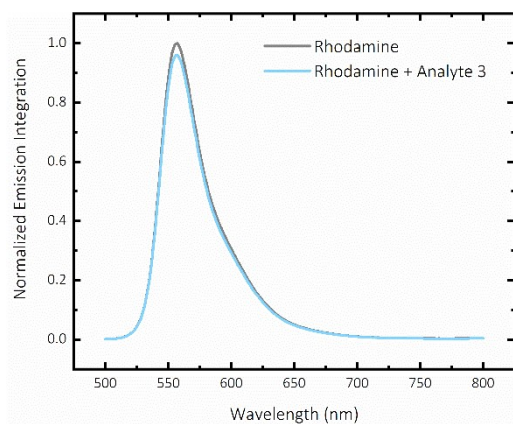

**Figure S34.** Fluorescence modulation of analyte **3** in the presence of 2-HPCD

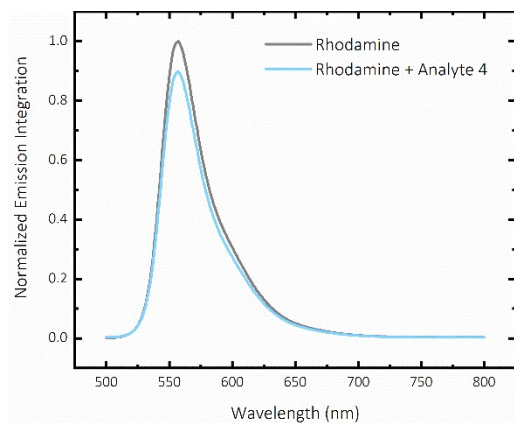

**Figure S35.** Fluorescence modulation of analyte **4** in the presence of 2-HPCD

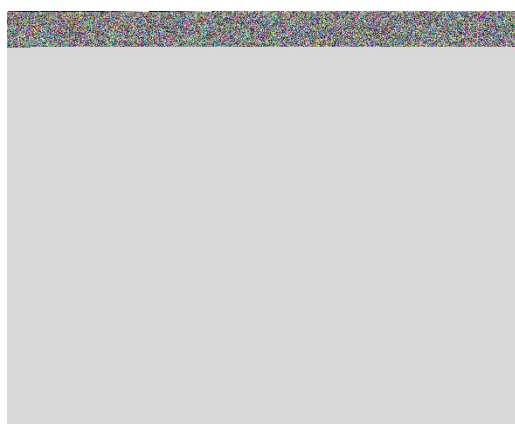

**Figure S36.** Fluorescence modulation of analyte **5** in the presence of 2-HPCD

No

CD

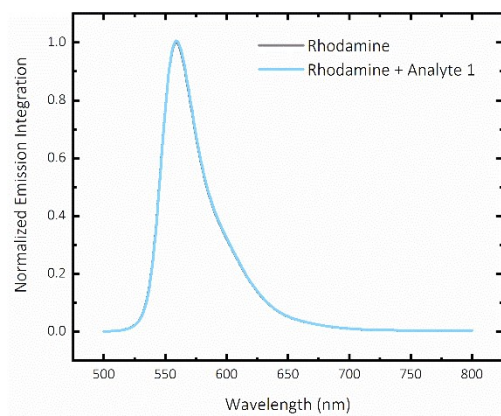

**Figure S37.** Fluorescence modulation of analyte **1** in the presence of no CD

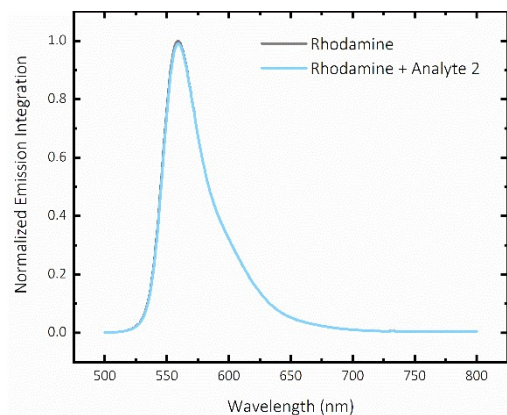

**Figure S38.** Fluorescence modulation of analyte **2** in the presence of no CD

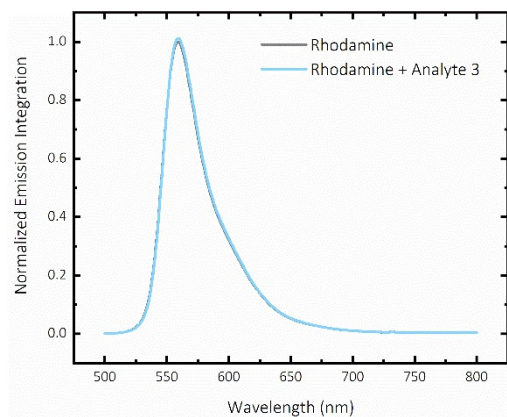

**Figure S39.** Fluorescence modulation of analyte **3** in the presence of no CD

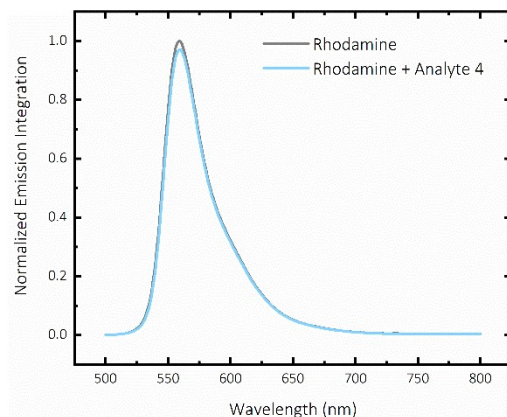

**Figure S40.** Fluorescence modulation of analyte **4** in the presence of no CD

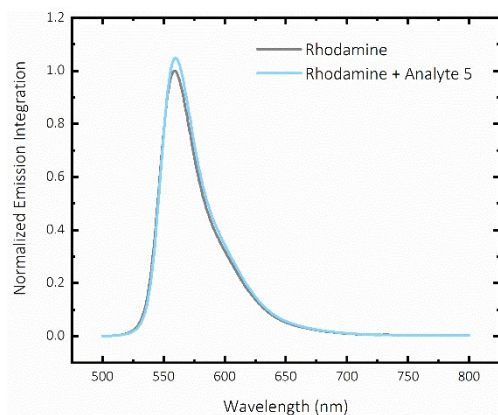

**Figure S41.** Fluorescence modulation of analyte **5** in the presence of no CD  
With 20  $\mu$ L analyte addition  
 $\beta$ -CD

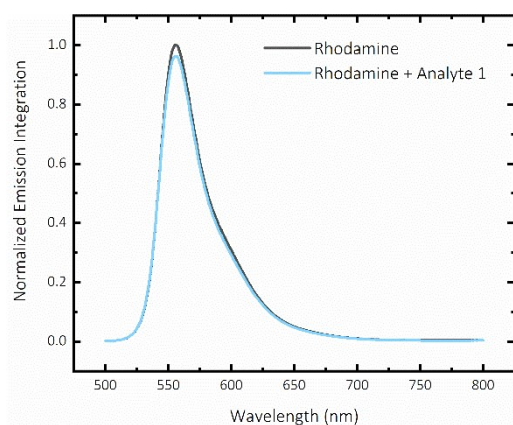

**Figure S42.** Fluorescence modulation of analyte **1** in the presence of  $\beta$ -CD

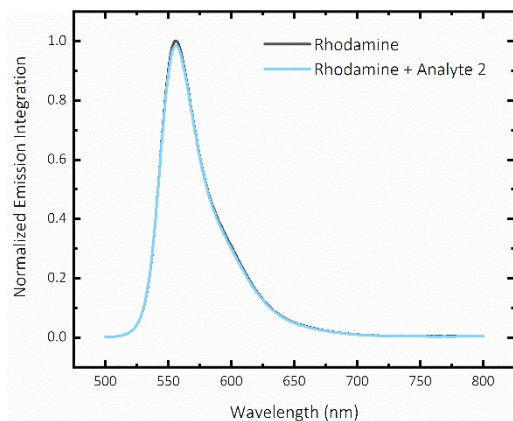

**Figure S43.** Fluorescence modulation of analyte **2** in the presence of  $\beta$ -CD

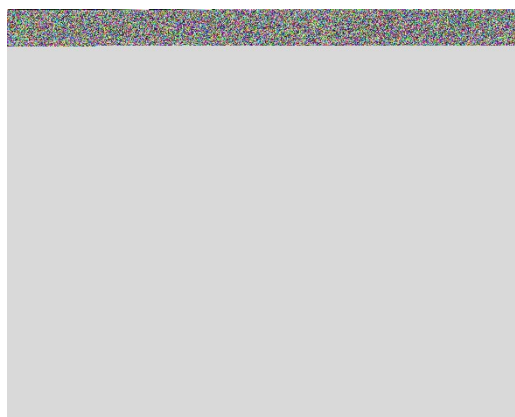

**Figure S44.** Fluorescence modulation of analyte **3** in the presence of  $\beta$ -CD

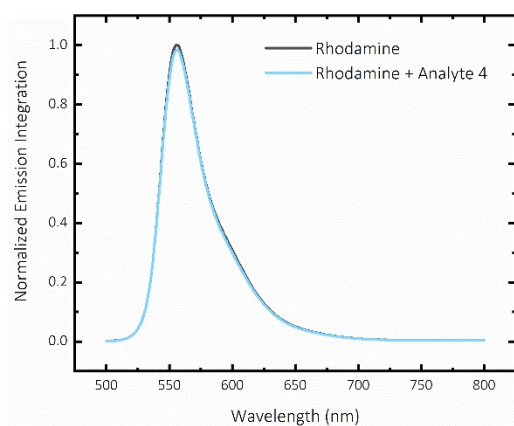

**Figure S45.** Fluorescence modulation of analyte **4** in the presence of  $\beta$ -CD

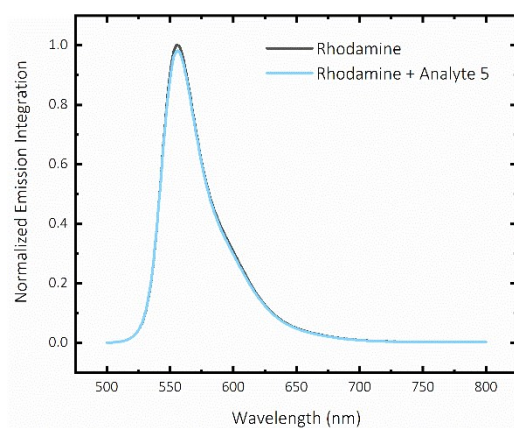

**Figure S46.** Fluorescence modulation of analyte **5** in the presence of  $\beta$ -CD

### Me- $\beta$ -CD

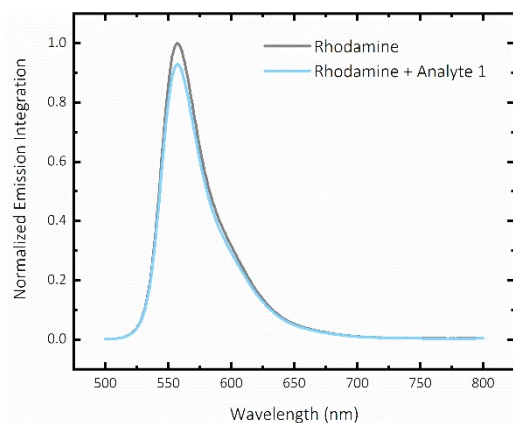

**Figure S47.** Fluorescence modulation of analyte **1** in the presence of Me- $\beta$ -CD

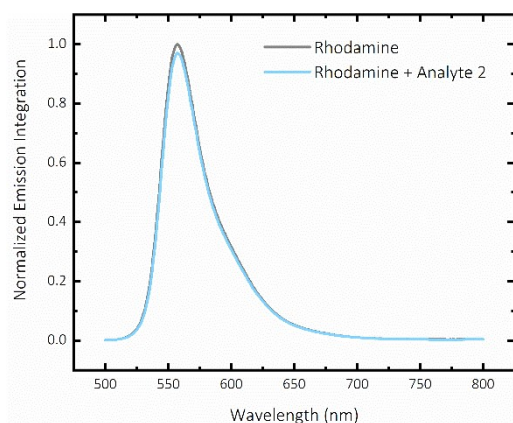

**Figure S48.** Fluorescence modulation of analyte **2** in the presence of Me- $\beta$ -CD

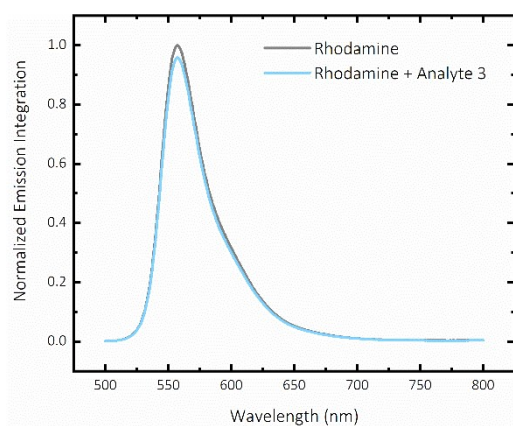

**Figure S49.** Fluorescence modulation of analyte **3** in the presence of Me- $\beta$ -CD

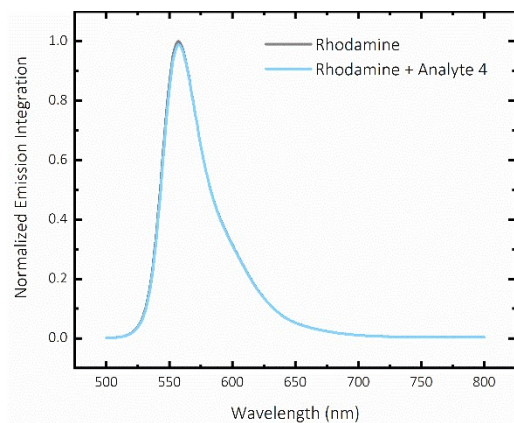

**Figure S50.** Fluorescence modulation of analyte **4** in the presence of Me- $\beta$ -CD

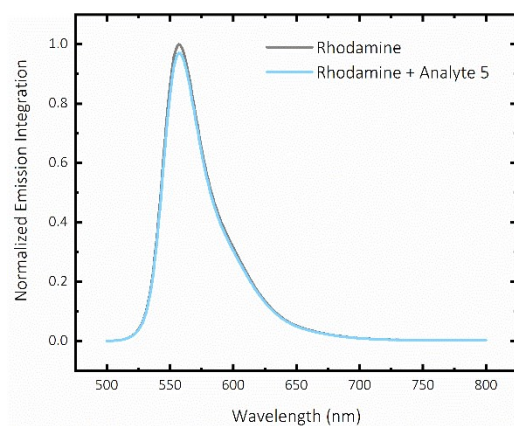

**Figure S51.** Fluorescence modulation of analyte **5** in the presence of Me- $\beta$ -CD

### 2-HPCD

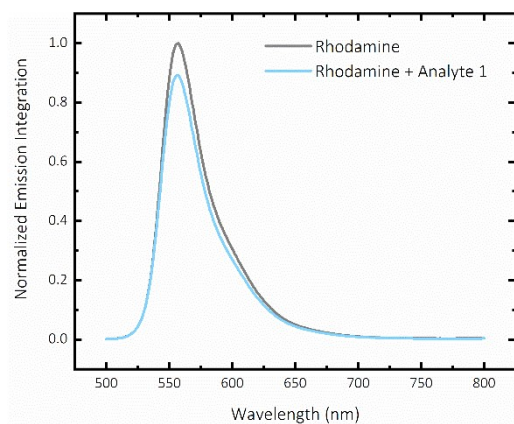

**Figure S52.** Fluorescence modulation of analyte **1** in the presence of 2-HPCD

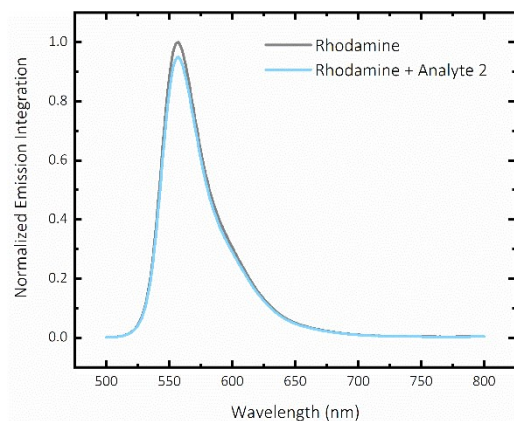

**Figure S53.** Fluorescence modulation of analyte **2** in the presence of 2-HPCD

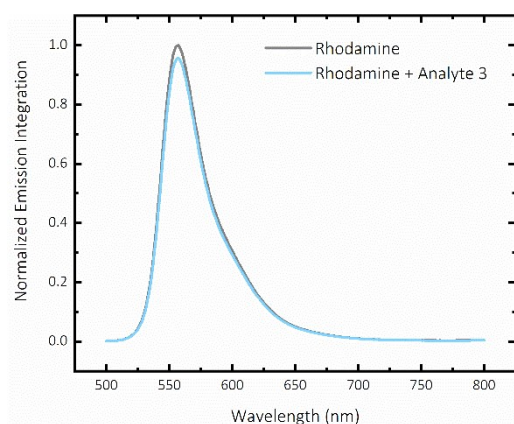

**Figure S54.** Fluorescence modulation of analyte **3** in the presence of 2-HPCD

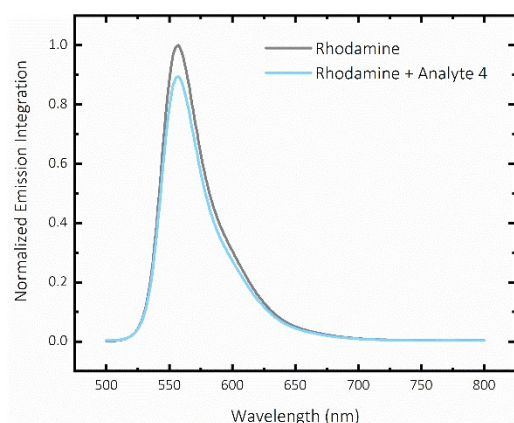

**Figure S55.** Fluorescence modulation of analyte **4** in the presence of 2-HPCD

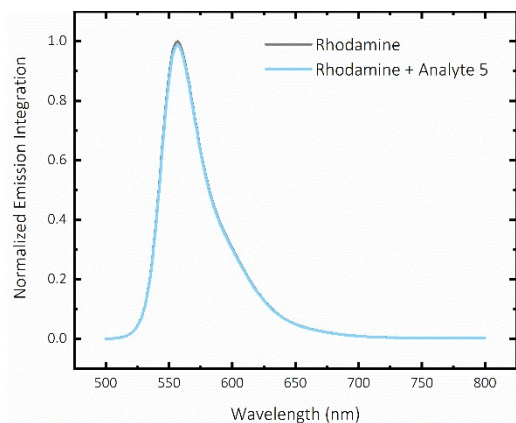

**Figure S56.** Fluorescence modulation of analyte **5** in the presence of 2-HPCD

No

CD

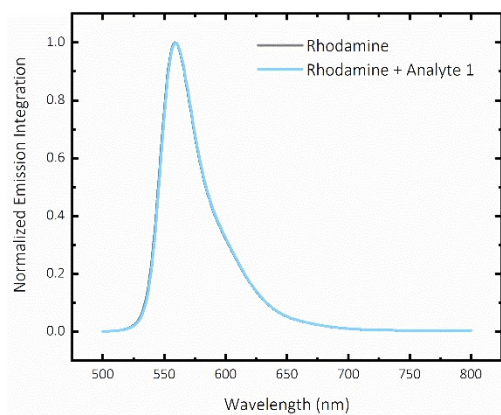

**Figure S57.** Fluorescence modulation of analyte **1** in the presence of no CD

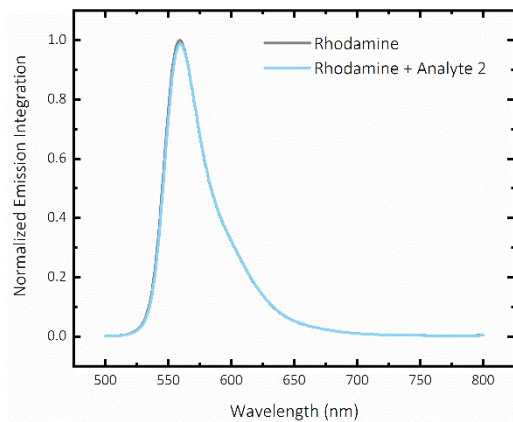

**Figure S58.** Fluorescence modulation of analyte **2** in the presence of no CD

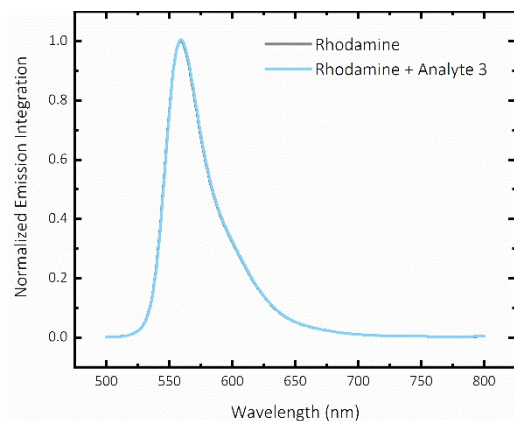

**Figure S59.** Fluorescence modulation of analyte **3** in the presence of no CD

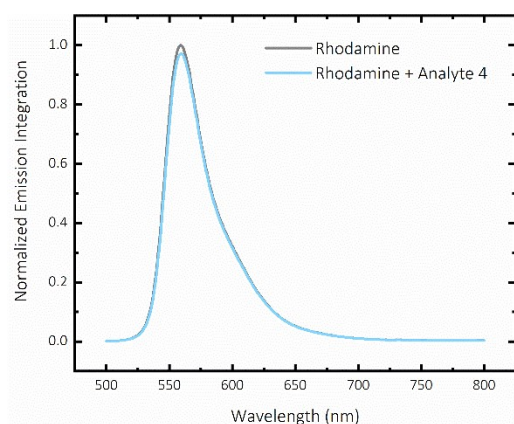

**Figure S60.** Fluorescence modulation of analyte **4** in the presence of no CD

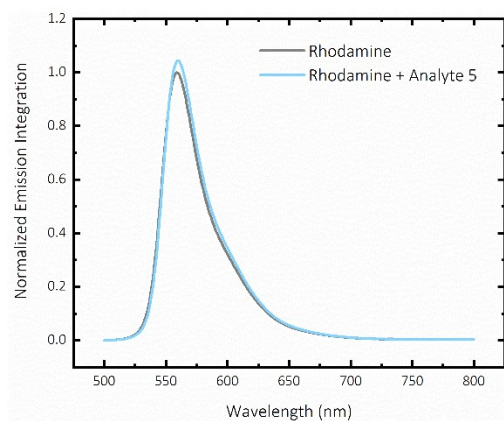

**Figure S61.** Fluorescence modulation of analyte **5** in the presence of no CD

## Summary Figures for Combined Fluorescence Modulation Experiments using Fluorophore 6

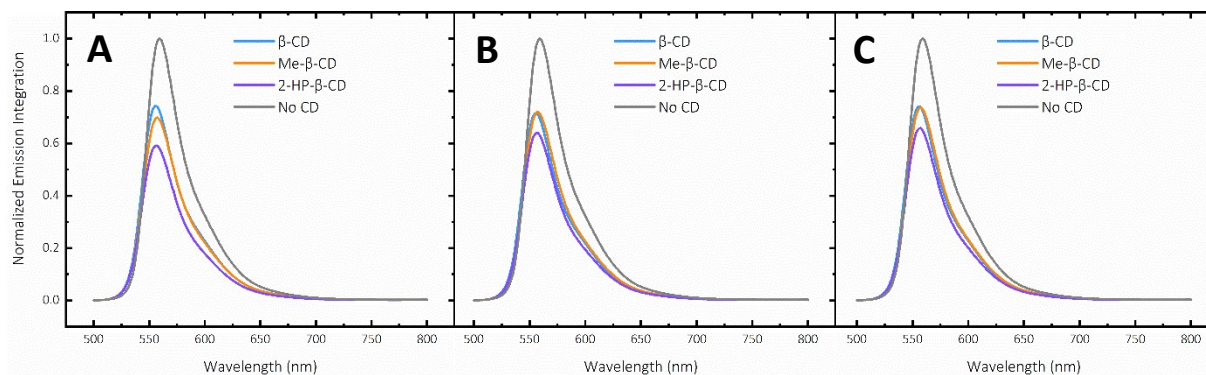

**Figure S62.** Fluorescence modulation of fluorophore **6** induced by: (A) 5  $\mu$ L of THF (B) 10  $\mu$ L of THF (C) 20  $\mu$ L of THF in the presence of all hosts

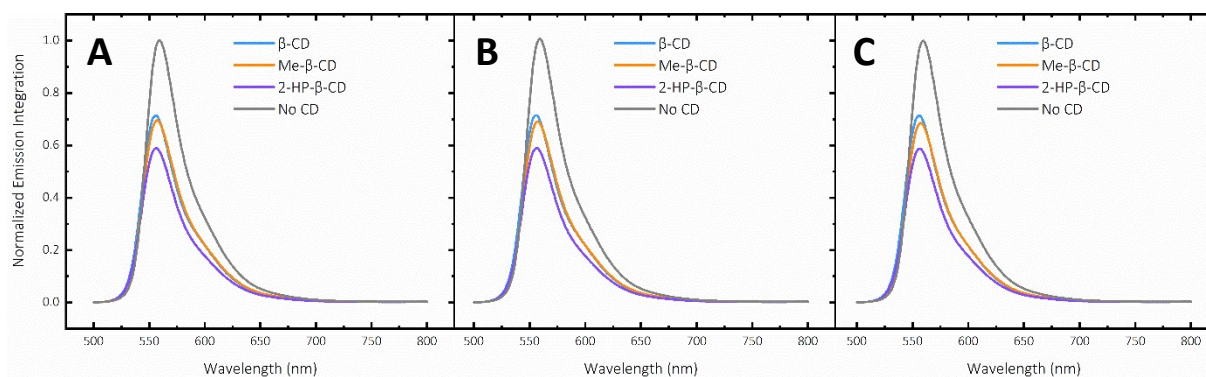

**Figure S63.** Fluorescence modulation of fluorophore **6** induced by: (A) 5  $\mu$ L of analyte **1** (B) 10  $\mu$ L of analyte **1** (C) 20  $\mu$ L of analyte **1** in the presence of all hosts

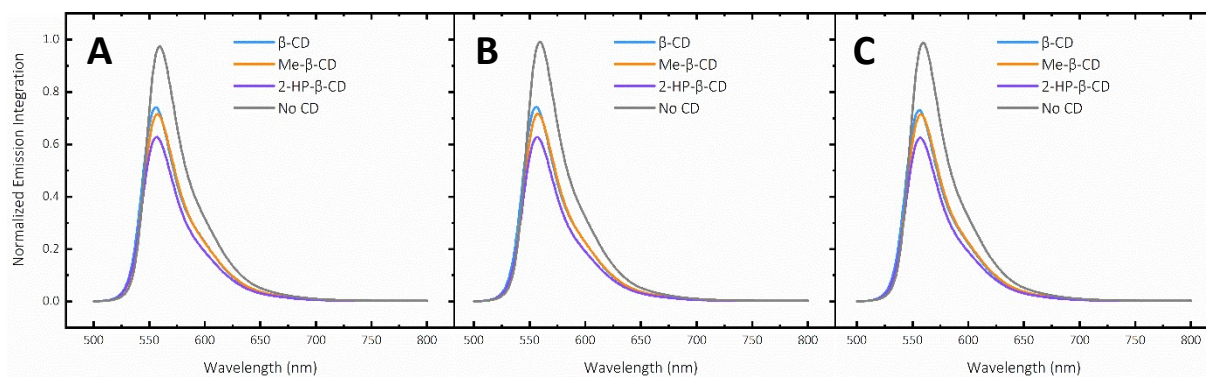

**Figure S64.** Fluorescence modulation of fluorophore **6** induced by: (A) 5  $\mu$ L of analyte **2** (B) 10  $\mu$ L of analyte **2** (C) 20  $\mu$ L of analyte **2** in the presence of all hosts

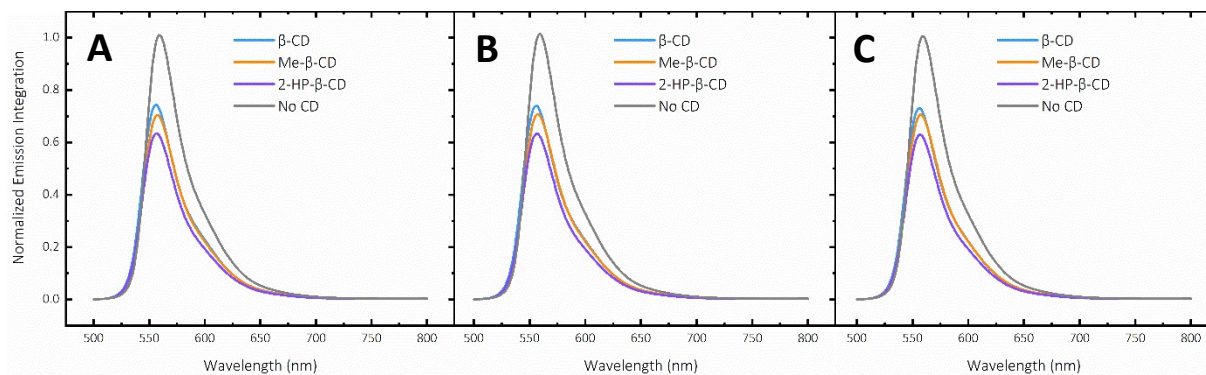

**Figure S65.** Fluorescence modulation of fluorophore **6** induced by: (A) 5  $\mu\text{L}$  of analyte **3** (B) 10  $\mu\text{L}$  of analyte **3** (C) 20  $\mu\text{L}$  of analyte **3** in the presence of all hosts

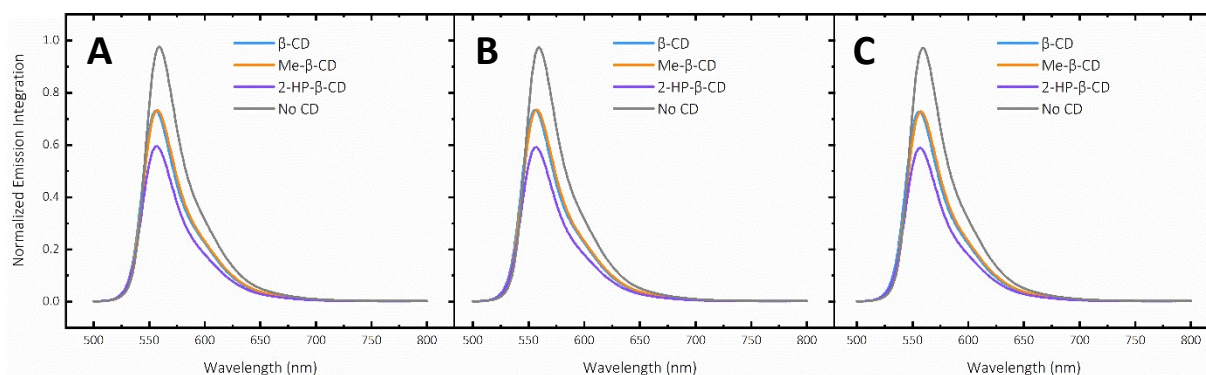

**Figure S66.** Fluorescence modulation of fluorophore **6** induced by: (A) 5  $\mu\text{L}$  of analyte **4** (B) 10  $\mu\text{L}$  of analyte **4** (C) 20  $\mu\text{L}$  of analyte **4** in the presence of all hosts

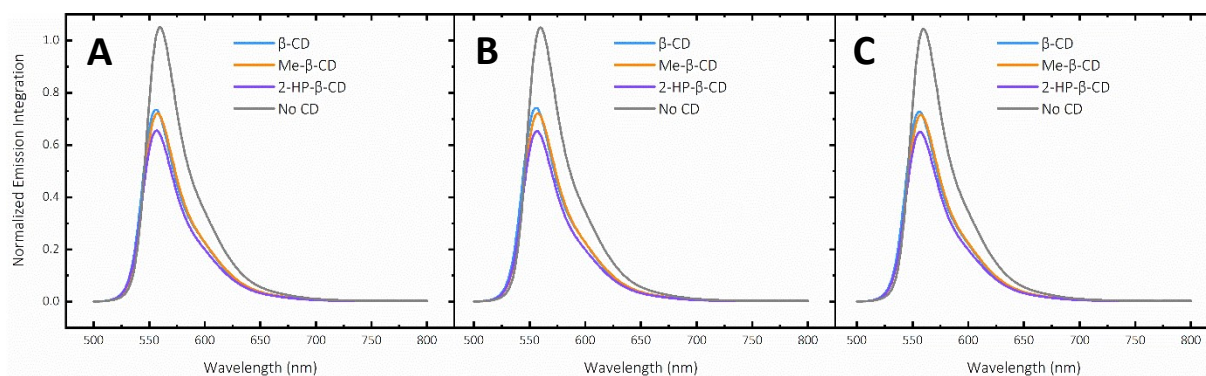

**Figure S67.** Fluorescence modulation of fluorophore **6** induced by: (A) 5  $\mu\text{L}$  of analyte **5** (B) 10  $\mu\text{L}$  of analyte **5** (C) 20  $\mu\text{L}$  of analyte **5** in the presence of all hosts

## Summary Figures for Limit of Detection (LOD) Experiments

Experiments were carried out with 5  $\mu\text{L}$  sequential additions of analytes with fluorophore **6** in the presence of all cyclodextrin hosts.

Limits of detection calibration curves of analytes in presence of  $\beta$ -CD and fluorophore **6**

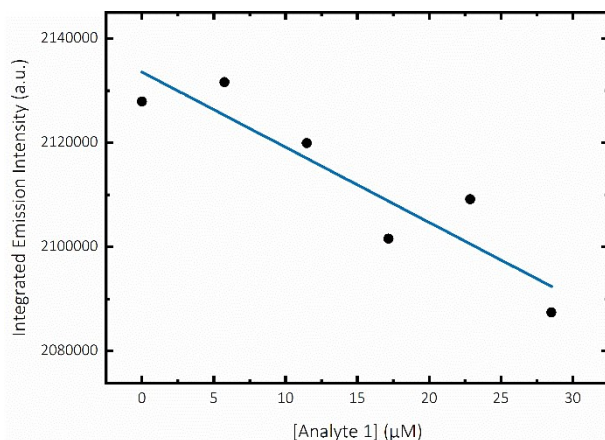

**Figure S68.** LOD calibration curve of analyte 1

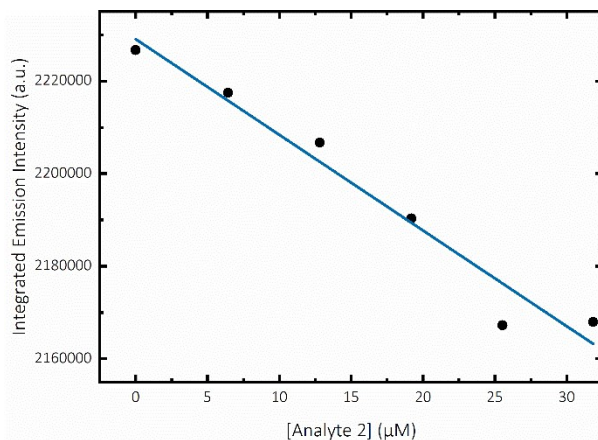

**Figure S69.** LOD calibration curve of analyte 2

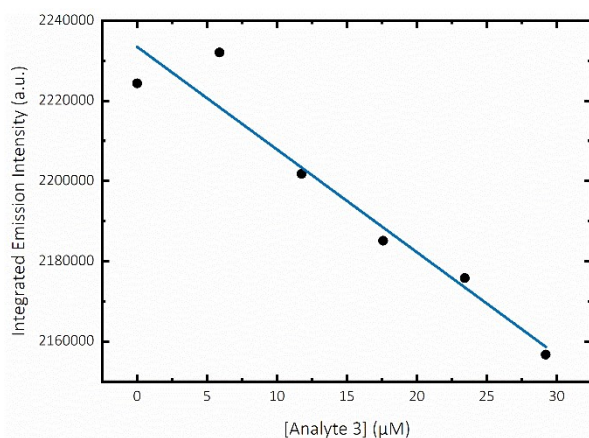

**Figure S70.** LOD calibration curve of analyte 3

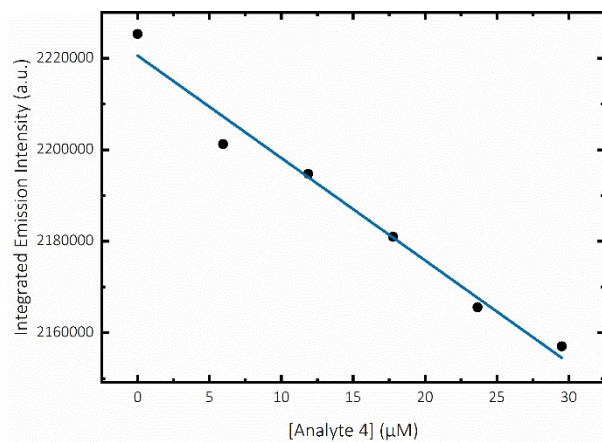

**Figure S71.** LOD calibration curve of analyte 4

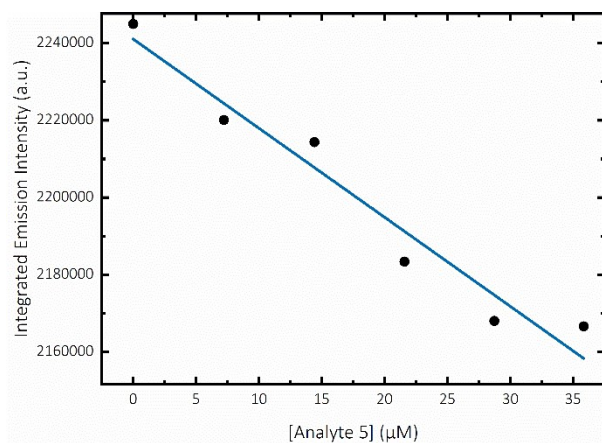

**Figure S72.** LOD calibration curve of analyte 5

Limits of detection calibration curves of analytes in presence of Me-β-CD and fluorophore 6

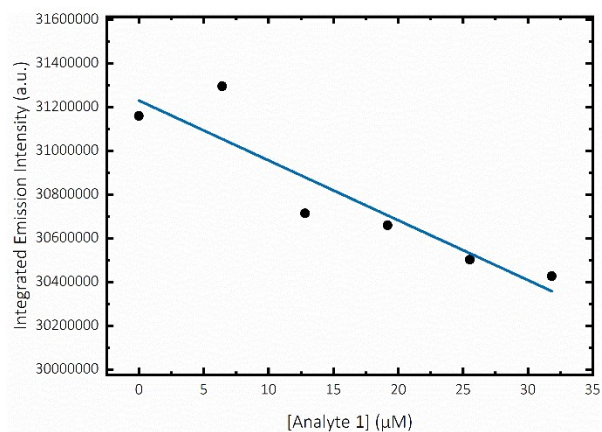

**Figure S73.** LOD calibration curve of analyte 1

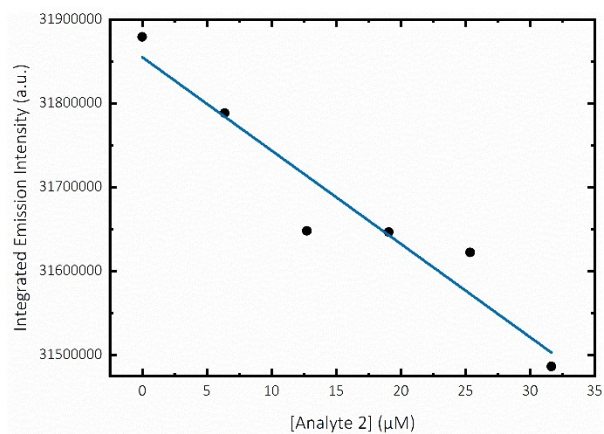

**Figure S74.** LOD calibration curve of analyte 2

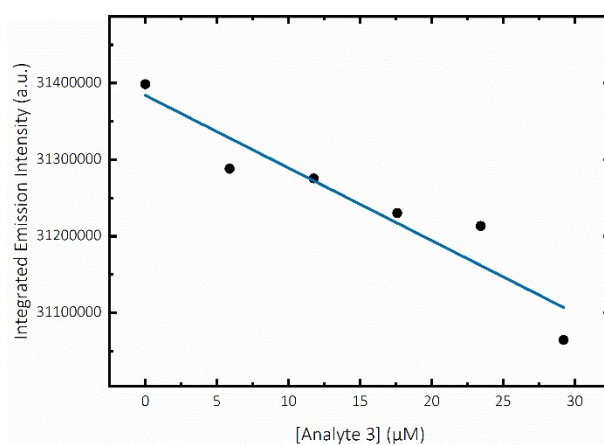

**Figure S75.** LOD calibration curve of analyte 3

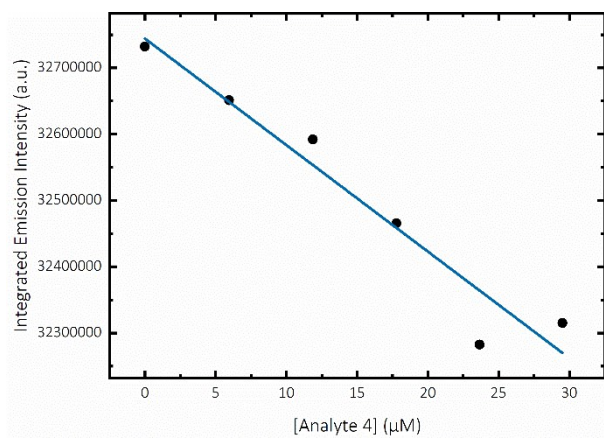

**Figure S76.** LOD calibration curve of analyte 4

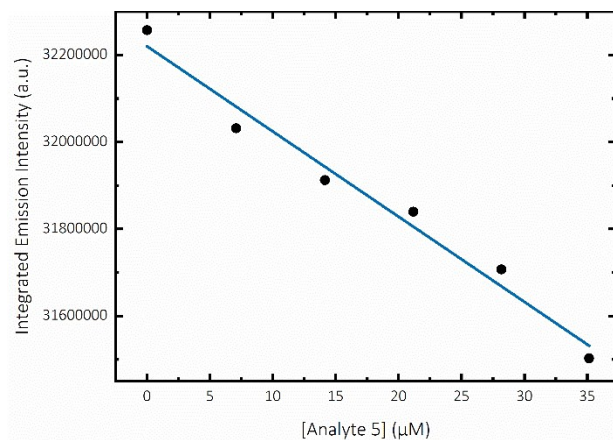

**Figure S77.** LOD calibration curve of analyte 5

Limits of detection calibration curves of analytes in presence of 2-HPCD and fluorophore 6

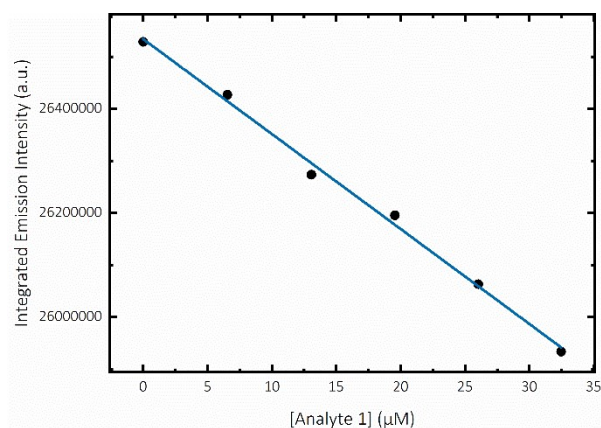

**Figure S78.** LOD calibration curve of analyte 1

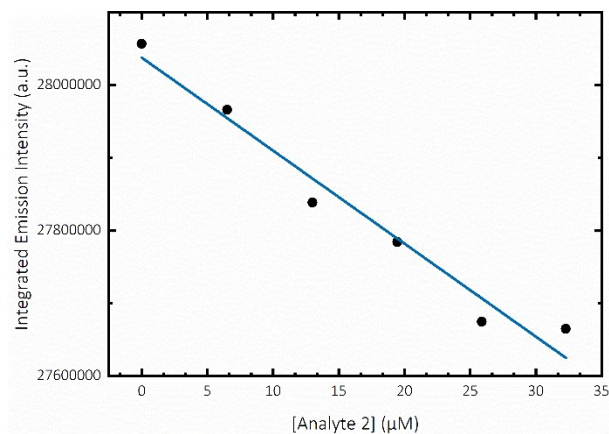

**Figure S79.** LOD calibration curve of analyte 2

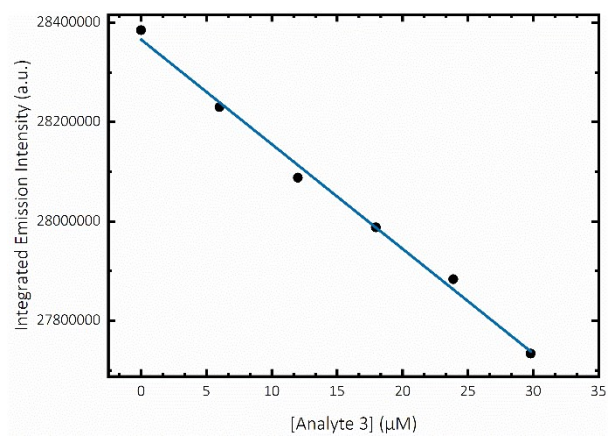

**Figure S80.** LOD calibration curve of analyte 3

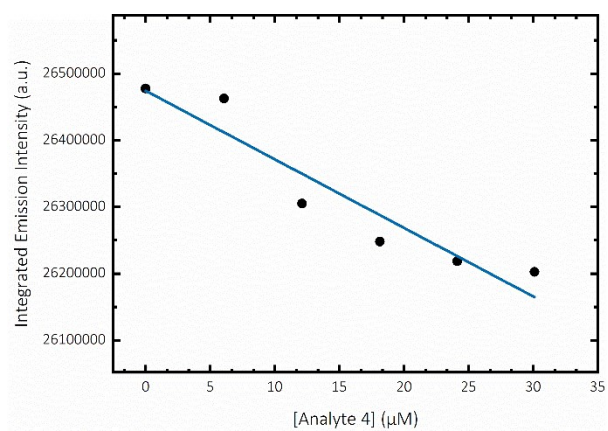

**Figure S81.** LOD calibration curve of analyte 4

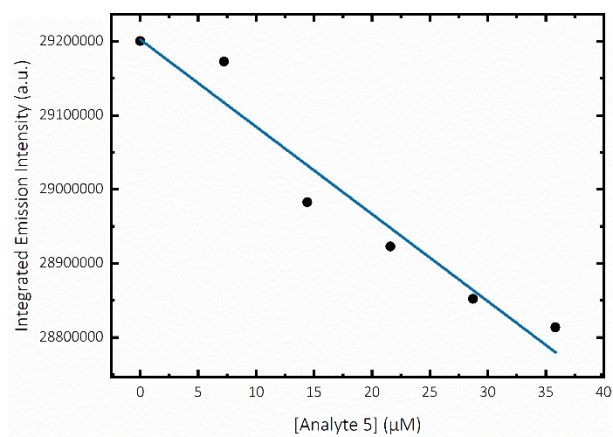

**Figure S82.** LOD calibration curve of analyte 5

## Summary Figures for Array Generation Experiments

With 5  $\mu$ L analyte additions

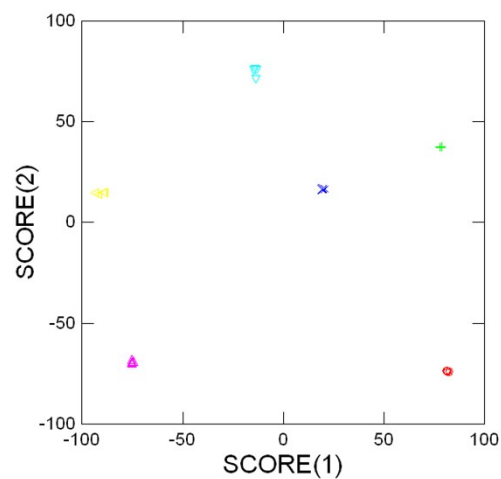

**Figure S83.** Linear discriminant analysis results with  $\beta$ -CD, Me- $\beta$ -CD, and 2-HPCD as predictors

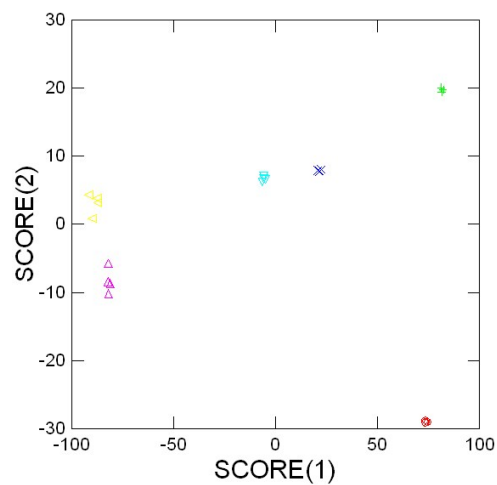

**Figure S84.** Linear discriminant analysis results using  $\beta$ -CD and Me- $\beta$ -CD as predictors

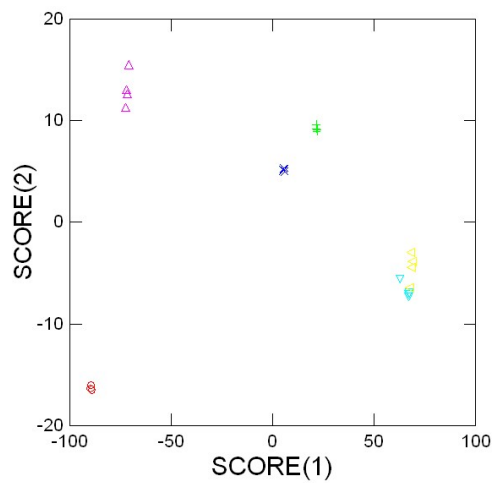

**Figure S85.** Linear discriminant analysis results using  $\beta$ -CD and 2-HPCD as predictors

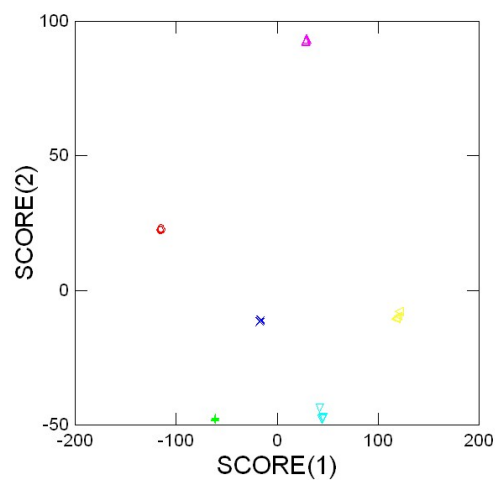

**Figure S86.** Linear discriminant analysis results using Me- $\beta$ -CD and 2-HPCD as predictors  
With 10  $\mu$ L analyte additions

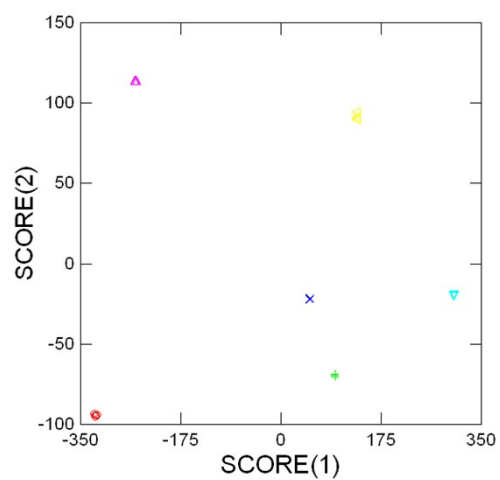

**Figure S87.** Linear discriminant analysis results with  $\beta$ -CD, Me- $\beta$ -CD, and 2-HPCD as predictors

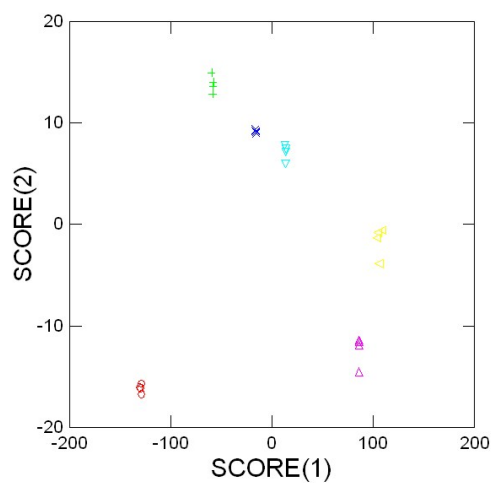

**Figure S88.** Linear discriminant analysis results using  $\beta$ -CD and Me- $\beta$ -CD as predictors

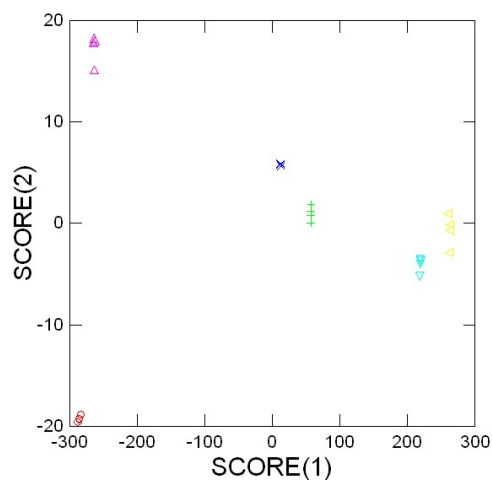

**Figure S89.** Linear discriminant analysis results using  $\beta$ -CD and 2-HPCD as predictors

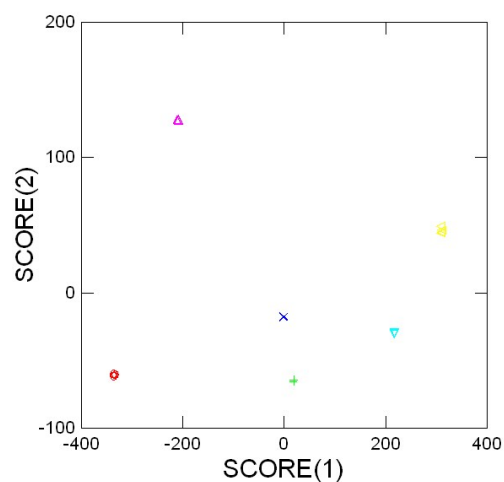

**Figure S90.** Linear discriminant analysis results using Me- $\beta$ -CD and 2-HPCD as predictors

With 20  $\mu$ L analyte additions

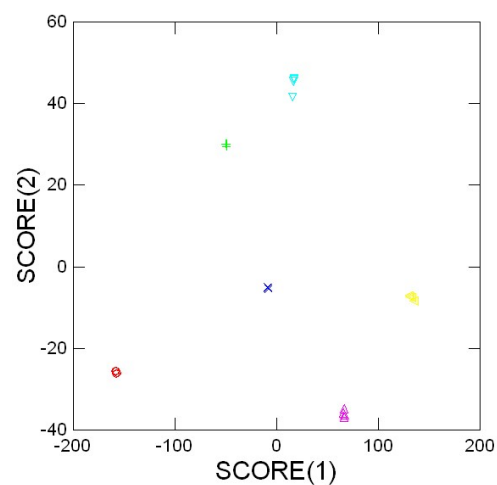

**Figure S91.** Linear discriminant analysis results with  $\beta$ -CD, Me- $\beta$ -CD, and 2-HPCD as predictors

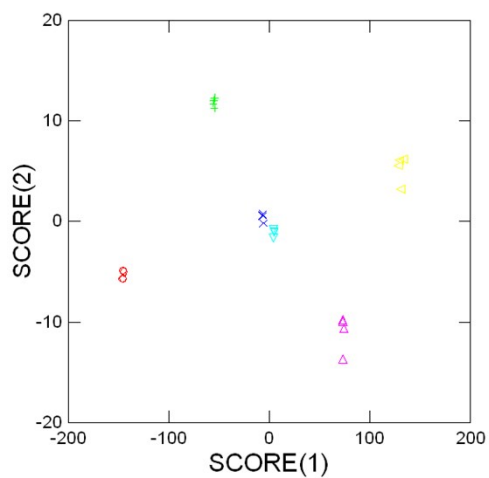

**Figure S92.** Linear discriminant analysis results using  $\beta$ -CD and Me- $\beta$ -CD as predictors

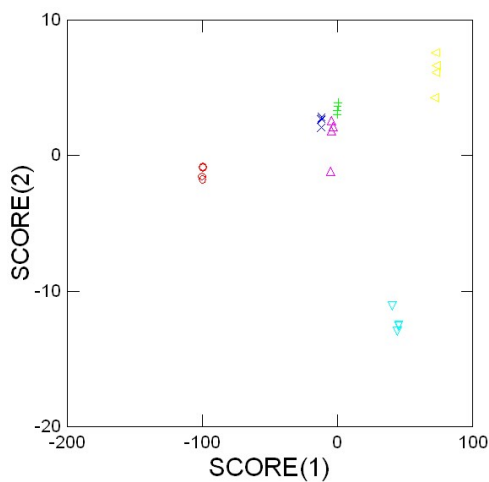

**Figure S93.** Linear discriminant analysis results using  $\beta$ -CD and 2-HPCD as predictors

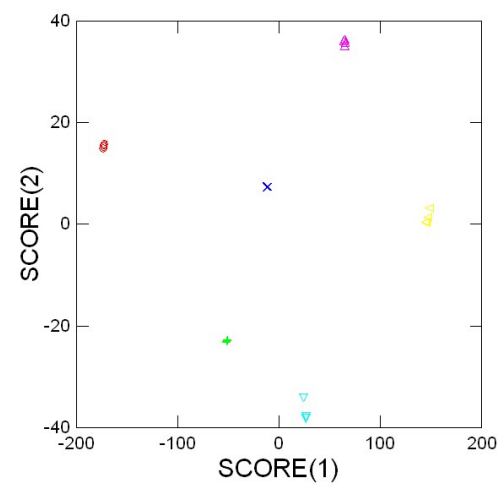

**Figure S94.** Linear discriminant analysis results using Me- $\beta$ -CD and 2-HPCD as predictors

All Additions with THF

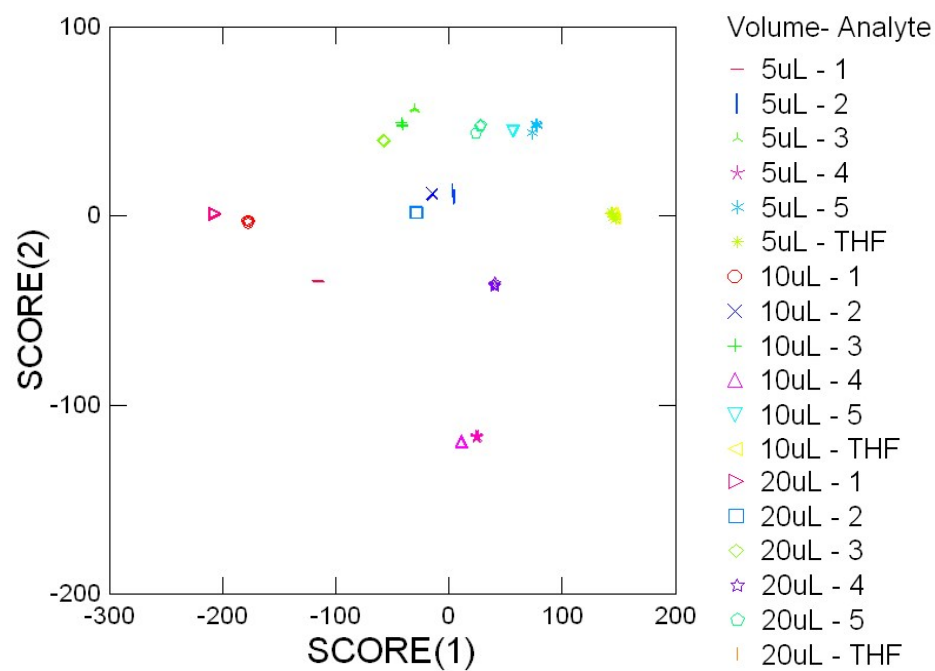

**Figure S95.** Linear discriminant analysis results with  $\beta$ -CD, Me- $\beta$ -CD, and 2-HPCD as predictors

All Additions excluding THF

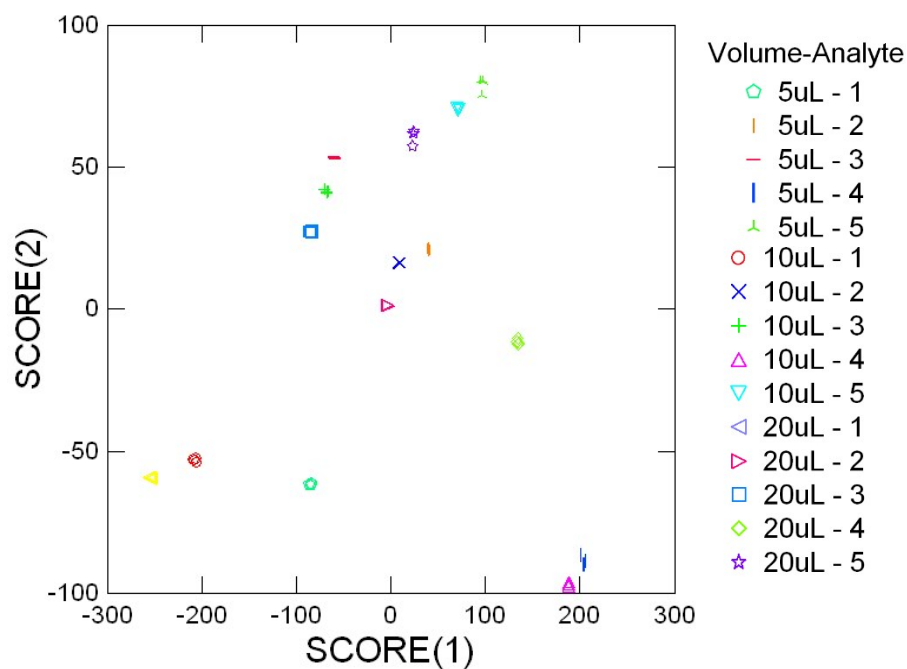

**Figure S96.** Linear discriminant analysis results with  $\beta$ -CD, Me- $\beta$ -CD, and 2-HPCD as predictors

## Summary Figures for Computational Experiments

### Spartan '18 Electrostatic Potential Map Diagrams

#### Map Color Legend

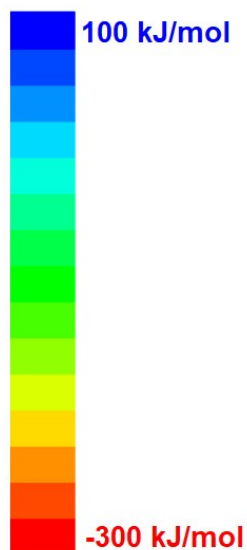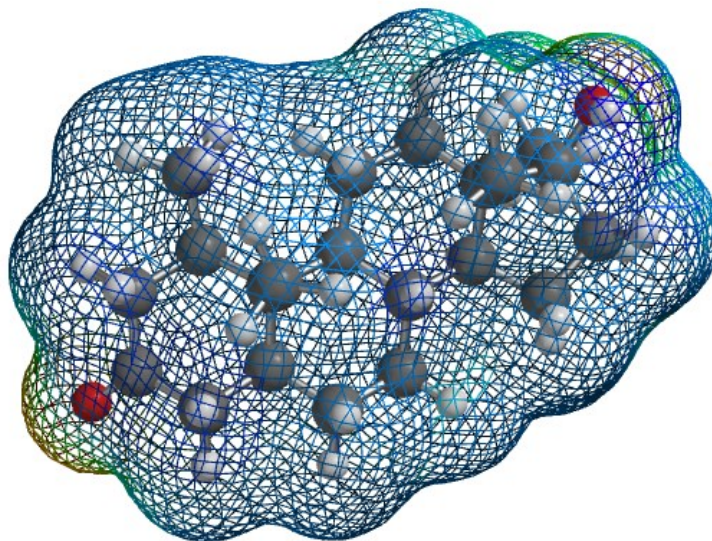

**Figure S97.** Electrostatic potential map of analyte **1** in the gas phase at its most stable (i.e. “ground state” configuration)

#### Map Color Legend

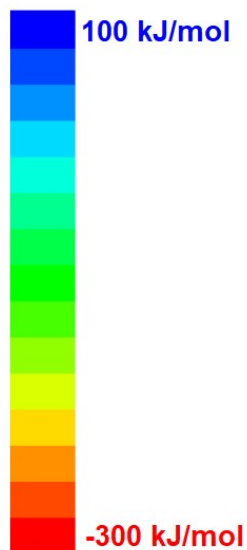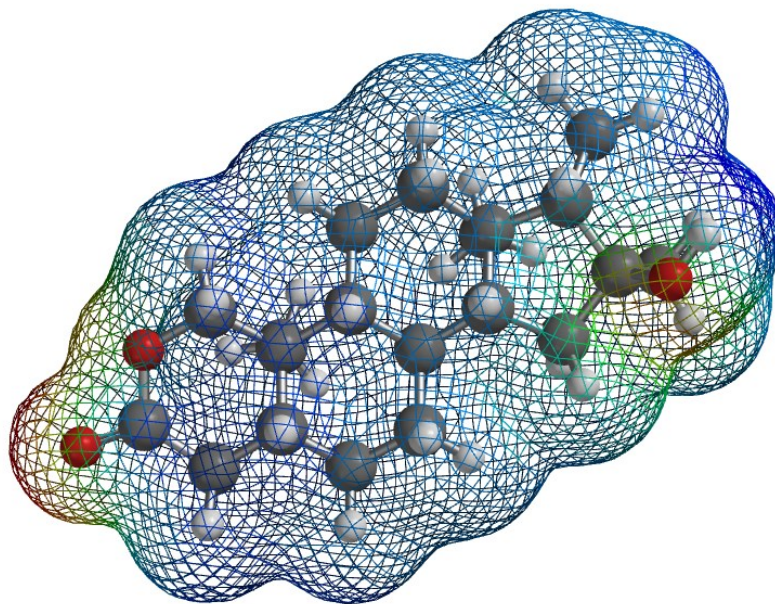

**Figure S98.** Electrostatic potential map of analyte **2** in the gas phase at its most stable (i.e. “ground state” configuration)

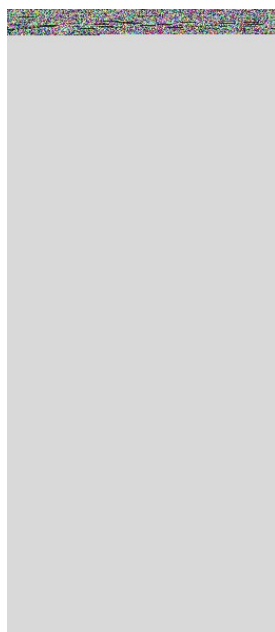

**Figure S99.** Electrostatic potential map of analyte **3** in the gas phase at its most stable (i.e. “ground state” configuration)

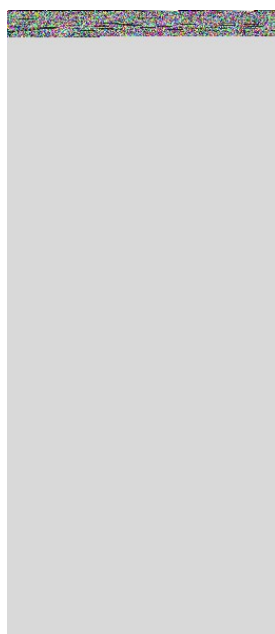

**Figure S100.** Electrostatic potential map of analyte **4** in the gas phase at its most stable (i.e. “ground state” configuration)

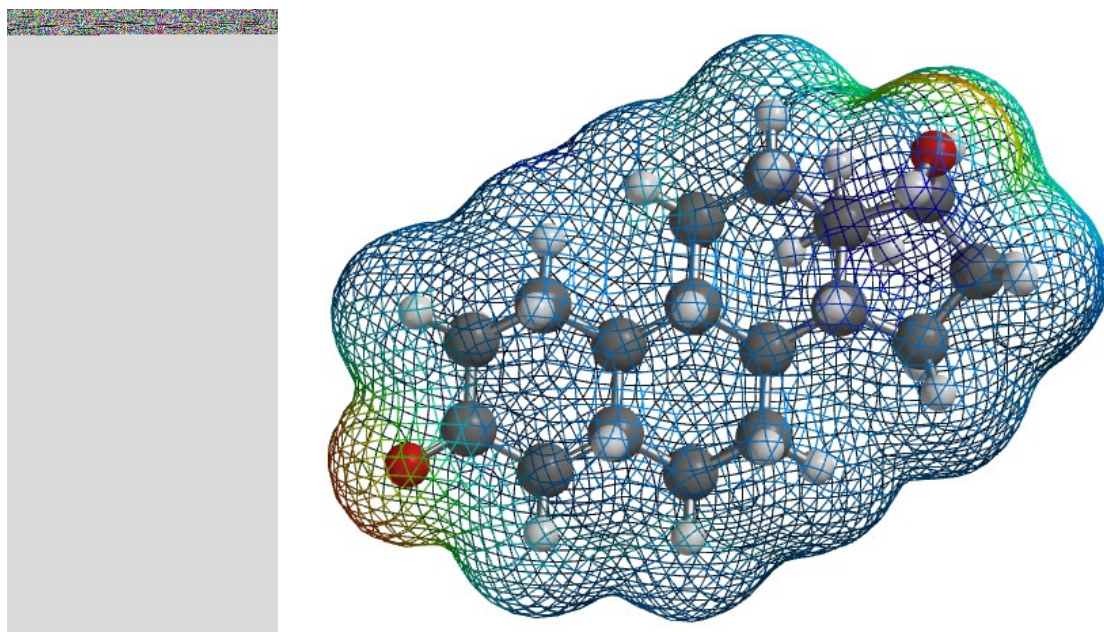

**Figure S101.** Electrostatic potential map of analyte **5** in the gas phase at its most stable (i.e. “ground state” configuration)



## REFERENCES

- (1) Loock, H.-P.; Wentzell, P. D. Detection Limits of Chemical Sensors: Applications and Misapplications. *Sensors and Actuators B: Chemical* **2012**, *173*, 157–163. <https://doi.org/10.1016/j.snb.2012.06.071>.
- (2) Belter, M.; Sajnóg, A.; Barańkiewicz, D. Over a Century of Detection and Quantification Capabilities in Analytical Chemistry – Historical Overview and Trends. *Talanta* **2014**, *129*, 606–616. <https://doi.org/10.1016/j.talanta.2014.05.018>.
- (3) DiScenza, D. J.; Lynch, J.; Miller, J.; Verderame, M.; Levine, M. Detection of Organochlorine Pesticides in Contaminated Marine Environments via Cyclodextrin-Promoted Fluorescence Modulation. *ACS Omega* **2017**, *2* (12), 8591–8599. <https://doi.org/10.1021/acsomega.7b00991>.
